1 ***Listeria monocytogenes* faecal carriage is common and driven by microbiota**

2

3

4 Marc Garcia-Garcera<sup>1,#</sup>, Lukas Hafner<sup>2,3,4,#</sup>, Christophe Burucoa<sup>5,6,8,#</sup>, Alexandra Moura<sup>2,3,7</sup>,  
5 Maxime Pichon<sup>5,6,8,†</sup>, Marc Lecuit<sup>2,3,4,7,8,†,\*</sup>

6

7 <sup>1</sup> University of Lausanne, Department of Fundamental Microbiology, 1015 Lausanne, Switzerland

8 <sup>2</sup> Institut Pasteur, Biology of Infection Unit, 75015 Paris, France

9 <sup>3</sup> Inserm U1117, 75015 Paris, France

10 <sup>4</sup> Université de Paris, 75006 Paris, France

11 <sup>5</sup> University Hospital of Poitiers, Infectious Agents Department, Bacteriology and Infection Control  
12 Laboratory, 86021 Poitiers, France

13 <sup>6</sup> Université de Poitiers, Faculté de Médecine et de Pharmacie, EA 4331, 86022 Poitiers, France

14 <sup>7</sup> National Reference Centre and World Health Organization Collaborating Centre for *Listeria*, Institut  
15 Pasteur, 75724 Paris, France

16 <sup>8</sup> Necker-Enfants Malades University Hospital, Division of Infectious Diseases and Tropical Medicine,  
17 Institut Imagine, 75743 Paris, France

18

19 # These authors contributed equally to this work

20 † These authors share senior authorship

21 § Current address: Université de Poitiers, Faculté de Médecine et de Pharmacie, Inserm U1070, 86022  
22 Poitiers, France

23 \* Correspondence: marc.lecuit@pasteur.fr

24 **Abstract**

25 *Listeria* genus comprises two opportunistic pathogenic species, *L. monocytogenes* (*Lm*) and *L.*  
26 *ivanovii*, and several non-pathogenic species. All can thrive as saprophytes, whereas only  
27 pathogenic species cause systemic infections in human and cattle. Identifying *Listeria* species'  
28 respective biotopes is critical to understand the ecological contribution of *Listeria* pathogenic  
29 potential. Here, we aimed at detecting *Listeria* in samples of diverse origins, to highlight  
30 ecological differences between pathogenic and non-pathogenic species. We retrieved 16S  
31 rDNA datasets from the metagenomics MG-RAST database and determined the prevalence and  
32 abundance of *Listeria* species in various sources. Overall, *Listeria* was detected in 14% of  
33 datasets. *Lm* was the most prevalent species, most abundant both in soil and host-associated  
34 environments, including in 5% of human stools. *Lm* was also detected in 10% of human stool  
35 samples from an independent cohort of 900 healthy asymptomatic donors. A specific  
36 microbiota signature was associated with *Lm* faecal carriage in human, as well as in  
37 experimentally inoculated mice, in which it preceded *Lm* long-term gut colonization, indicating  
38 that gut microbiota composition influences *Lm* faecal carriage. These results suggest that  
39 asymptomatic faecal carriage, rather than disease, exerts purifying selection on *Lm* “virulence  
40 genes”.

## 41 **Introduction**

42 Infectious disease symptoms can favor the transmission of pathogenic microorganisms and  
43 hence select for genes that induce these symptoms (e. g. cough induced by *Mycobacterium*  
44 *tuberculosis*<sup>1</sup>). However, asymptomatic host colonization can also favor microbial transmission,  
45 and thereby select for genes involved in host-microbe association that may also be involved in  
46 the development of opportunistic infections. *Listeria monocytogenes* (*Lm*) and *L. ivanovii* can  
47 cause opportunistic infection in human and other mammals including cattle<sup>2,3</sup>, leading to fetal-  
48 placental infection, abortion and encephalitis, in contrast to other *Listeria* species which are  
49 non-pathogenic. *Lm* is known to alternate between a saprophytic and a host-associated lifestyle  
50 during which it expresses so-called virulence factors that mediate tissue invasion and within-  
51 host dissemination<sup>4</sup>. Most of these virulence factors are part of *Lm* core genome and subjected  
52 to purifying selection<sup>5-7</sup>. *Lm* most virulent clones are also the most adapted to mammalian gut  
53 colonization<sup>8</sup> and *Lm* can be released from infected tissues back to the intestinal lumen<sup>6,9,10</sup>,  
54 indicating that virulence may ultimately promote *Lm* faecal carriage and thereby play a major  
55 role in its dissemination.

56  
57 *Lm* is a common contaminant of foodstuffs, and each human individual in Western countries is  
58 estimated to be exposed to *Lm* multiple times per year<sup>11</sup>. Yet the incidence of microbiologically  
59 proven invasive human listeriosis is extremely low, with 0.28 and 0.6 cases *per* 100,000 people  
60 in the US and Europe, respectively<sup>12,13</sup>. This implies that in most cases, human exposure to *Lm*  
61 leads to either absence of infection, and/or clinically silent gut colonisation, and suggests that  
62 *Lm* virulence genes are likely not selected for their capacity to induce clinically overt disease.  
63 There have been reports of *Lm* asymptomatic faecal carriage, both in human and cattle<sup>14-23</sup>, and  
64 all large scale studies have suggested that the prevalence of *Lm* carriage is below 1%<sup>18-20</sup>.  
65 However, these studies were based on culture-based methods<sup>18-20</sup>, which are less sensitive when

66 directly compared to molecular detection methods like PCR and sequencing<sup>21,22,24</sup>. Large  
67 molecular studies on the distribution of *Listeria* species in mammals and the environment are  
68 not available<sup>25–27</sup>.

69

## 70 **Results**

71 Ecological sampling is influenced by *a priori* assumptions about potential niches<sup>28,29</sup>. Here we  
72 circumvented this limitation by assessing *Listeria* species distribution in publicly available  
73 metagenomic datasets from the large MG-RAST database<sup>30</sup>, to which high quality metadata are  
74 associated, and retrieved 2,490 full metagenomes and 11,907 16S rDNA high quality datasets  
75 (see Materials and methods). We assessed the impact of *Listeria* pathogenic potential on its  
76 ecological distribution by comparing the relative abundance (proportion of a species in a given  
77 sample, x axis, Fig. 1) and prevalence (frequency of a species in samples of a given category, y  
78 axis, Fig. 1) of the *Listeria* pathogenic species *Lm* and *L. ivanovii* to that of the non-pathogenic  
79 species *L. innocua*, *L. seeligeri* and *L. welshimeri*<sup>31</sup>.

80

81 *Listeria* was detected in 14.05% 16S datasets (Fig. 1a). Note that no positive result could be  
82 obtained using our approach (see Materials and Methods) analysing full metagenomes, in line  
83 with the relative low abundance of *Listeria* species<sup>32</sup> and consistent with a higher sensitivity of  
84 16S sequencing compared to full metagenome sequencing for a given sequencing depth<sup>33</sup>. *Lm*  
85 was most frequently present in soil (673/1,700; mean relative abundance  $1.2 \times 10^{-4}$ ), sludge  
86 (70/309), sediment (32/170) and host-associated samples (854/7,695; mean relative abundance  
87  $9.0 \times 10^{-5}$ ). Only few water (42/1,980) samples and no air sample (0/53) were positive for any  
88 *Listeria* species (Fig. 1a, and Fig. S1a for normalised data *per* category). *Lm* was the most  
89 prevalent *Listeria* species in both soil and host-associated environments (Fig. 1a). In samples  
90 where more than one *Listeria* species was present, *Lm* was significantly more abundant than

91 other *Listeria* species, both in soil and hosts (Fig. 1a and Fig. S1b). We next investigated *Listeria*  
92 species host range (Fig. 1b). *Lm* was found to be the most abundant (mean relative abundance  
93  $5.5 \times 10^{-3}$ ) and prevalent in cattle (80/1,270; 6.30%), which have indeed been reported as a  
94 potential reservoir for *Lm*<sup>26</sup>, especially hypervirulent clonal complexes<sup>3,8,15</sup>. We detected *Lm* in  
95 human samples at a similar prevalence than in cattle (173/3,338; 5.18%), but 40 times less  
96 abundantly (mean relative abundance  $1.3 \times 10^{-4}$ ). *Lm* was also frequently found in chicken (mean  
97 relative abundance  $3.6 \times 10^{-4}$ , prevalence 28/552, 5.05%) and pig samples (mean relative  
98 abundance  $4.7 \times 10^{-4}$ , prevalence 48/300, 16%) but not that of goats (0/212), where only  
99 *L. ivanovii* was detected, consistent with the known enrichment of *L. ivanovii* in small  
100 ruminants<sup>34</sup>. A high *Lm* prevalence in pigs and wild boars has been reported<sup>35-37</sup>, and pigs might  
101 constitute an underappreciated niche for *Lm*. We next investigated the human sampling sites in  
102 which *Lm* was present. As expected for a foodborne pathogen, *Lm* was detected in faecal  
103 samples (108/2,238), but also in oral (7/108) and sputum (3/50) samples (Fig. 1c), consistent  
104 with reports that *Lm* may colonise both the gut and the oral cavity<sup>38,39</sup>. *Lm* was rarely present  
105 in skin samples (2/56) and absent in vaginal samples (0/30), but for both categories only few  
106 datasets were available for analysis. The non-pathogenic species *L. innocua* and *L. seeligeri*  
107 were not detected in any human-associated samples, while *L. ivanovii*, the only other pathogenic  
108 *Listeria* species, was detected, albeit far less than *Lm*, second most frequently in human stools  
109 (Fig. 1c).

110

111 We aimed to replicate the result of frequent *Lm* carriage in human independently, and assessed  
112 *Lm* presence by *hly* PCR in the stools of a cohort of 900 healthy and a cohort of 125 diarrheic  
113 individuals (see Material and methods). It was detected in 10% (90/900) of healthy human stool  
114 samples and 20.8% (26/125) of diarrheic stools samples (Fig. S1c, Table S1). The enrichment  
115 of *Lm* in diarrhoea samples ( $\chi^2=11.702$ ,  $P=0.0018$ , Benjamini-Hochberg correction) is

116 consistent with the observation that *Lm* can induce diarrhoea<sup>40,41</sup>. The two-fold higher carriage  
117 level in healthy asymptomatic donors in this cohort from France, relative to the 16S datasets  
118 from MG-RAST may be due to the different sensitivities of the two methods (targeted *hly*  
119 amplification *versus* total 16S amplification), and sample selection bias reflecting a potential  
120 differential exposure to *Lm*-contaminated food<sup>30</sup>. Neither age nor gender was associated to  
121 asymptomatic carriage (Table S2).

122

123 The gut microbiota is a major line of defence against foodborne pathogens, and several  
124 commensals exert a protective effect against enteropathogens<sup>42</sup>, including *Lm*<sup>43</sup>. *Lm* also  
125 produces bacteriocins that can alter microbiota composition<sup>44,45</sup>. In order to assess if microbiota  
126 composition has an impact on *Lm* faecal carriage in human and *vice versa*, we investigated the  
127 relative abundance of microbiota taxonomic groups in MG-RAST human faecal samples. To  
128 take into account the compositional nature of data of different origins<sup>46</sup>, we calculated the ratios  
129 between microbiota phylogenetic groups and *Lm* abundance in the human microbiome datasets  
130 where *Lm* is present (Fig. 2, Supplementary Tables S3 and S4). *Lm* abundance correlated with  
131 the ratio of abundance of Firmicutes to Bacteroidetes phyla (Fig. 2a left), consistent with the  
132 observation that an increase of this ratio correlates with increased susceptibility to *Lm*<sup>47</sup>. This  
133 correlation is not due to *Lm* itself, as this species was excluded when the relative abundance of  
134 Firmicutes was calculated. The ratio of Actinobacteria to Bacteroidetes also correlated with *Lm*  
135 abundance (Fig. 2b left), and Actinobacteria were also significantly enriched compared to  
136 Firmicutes and Proteobacteria (Table S3). *Lm* abundance also correlated positively at the family  
137 and order levels with Lachnospiraceae (Fig. 2c left), Coriobacteriales (Fig. 2d left),  
138 Actinomycetaceae (Fig. 2e left), Erysipelotrichaceae (Fig. 2f left), and negatively with  
139 Porphyromonadaceae (Fig. 2g left). Erysipelotrichaceae have previously been reported to be  
140 elevated in asymptomatic *C. difficile* carriers, which suggests that loss of colonisation resistance

141 is associated with this family<sup>48</sup>. In line with our results, a protective effect of  
142 Porphyromonadaceae has also been observed against *Salmonella enterica* serovar  
143 Typhimurium<sup>49</sup>, *Enterococcus faecium*<sup>50</sup> and *C. difficile*<sup>51</sup>. The aforementioned significant  
144 associations with *Lm* abundance in faecal carriers were also found significant between carriers  
145 and non-carriers (Fig. 2, right panels), with the exception of Porphyromonadaceae for which  
146 only a trend was observed (Fig. 2f, right). For Lachnospiraceae, non-carriers showed a  
147 significantly higher prevalence than carriers (Fig. 2c, right), reflecting that comparisons  
148 between carriers and non-carriers are prone to study- and sample-dependent biases. Carriers  
149 also displayed less diverse microbiomes than non-carriers (Fig. S2a), a finding consistent with  
150 the observation that  $\alpha$ -diversity is also involved in colonization resistance<sup>42</sup> against  
151 enteropathogens such as *C. difficile*<sup>52</sup>, *Salmonella* or *Shigella*<sup>53</sup>. The overlap between the  
152 microbiota features associated with intestinal colonization by *Lm* and other well-known gut-  
153 colonising bacteria is consistent with our finding that *Lm* is frequently present in stools of  
154 asymptomatic individuals.

155  
156 *Lm* shedding from infected tissues back in the intestinal lumen may favour long-term faecal  
157 carriage and account for the purifying selection of its virulence genes<sup>6,9,10</sup>, in line with the  
158 finding that the most virulent *Lm* clonal complexes are the most adapted to mammalian gut<sup>8</sup>,  
159 and the present observation that non-pathogenic species are not found in stool datasets retrieved  
160 from MG-RAST. To study *Lm* faecal carriage and its determinants experimentally, we  
161 inoculated mice intravenously with  $5 \times 10^3$  CFUs of *Lm* belonging to the hypervirulent clonal  
162 complex-1<sup>8,54</sup>. We observed a cage-dependent asymptomatic faecal carriage in 3/7 cages (11/26  
163 mice). *Lm* could be detected over 30-days post-inoculation. We classified faecal carriage as  
164 either heavy ( $>10^6$  CFU/g, 6 mice in 2 cages) or light ( $<10^6$  CFU/g, 4 mice in 1 cage, together  
165 with one non-carrier mouse) (Fig. 3a). In 4 cages (15 mice), no *Lm* was detected in the faeces

166 30-days post-inoculation (Fig. 3a). All mice recovered from infection as assessed by weight  
167 gain, independently of their carrier status (Fig. S2b). We also separated mice and observed  
168 persistent faecal carriage, ruling out that it was resulting from coprophagy.

169

170 Co-housed animals tend to have similar microbiota<sup>55</sup>, therefore the cage dependency of the  
171 observed differences in *Lm* carriage suggested that it was mediated by differences in gut  
172 microbiota composition. Indeed, heavy, light and non-carrier microbiota differed in microbial  
173 richness ( $\alpha$ -diversity) and composition ( $\beta$ -diversity): heavy carriers' microbiota was less diverse  
174 than that of light and non-carriers (Fig. S2c), consistent with results in human (Fig. S2a).  
175  $\beta$ -diversity analysis showed that faecal carriage groups differed also in composition  
176 (PERMANOVA  $P < 0.001$ ): heavy carriers clustered separately from light and non-carriers  
177 (Fig. 3b). The difference between the light carrier group and the others reflected the higher  
178 homogeneity of the former (Fig. 3b), and the difference between non- and heavy carriers was  
179 mainly driven by a different composition in Bacteroidetes: 7 and 4 out of the 25 most  
180 contributing taxa belonged to Porphyromonadaceae and Bacteroidaceae, respectively  
181 (Fig. 3c-e). Indeed, Porphyromonadaceae were less abundant in the permissive microbiota of  
182 heavy carriers than that of light and non-carriers, and were present at an intermediary level in  
183 light carriers (Fig. 3f), similar to our observation in human (Fig. 2g).

184

185 We finally investigated whether these differences in microbiota  $\alpha$ - and  $\beta$ -diversities result from  
186 or precede *Lm* carriage. We compared microbiota 16S composition before *Lm* inoculation and  
187 30-days post-inoculation. *Lm* inoculation did not affect microbiota  $\alpha$ -diversity (Fig. S3a). The  
188  $\beta$ -diversity difference observed between heavy and non-carriers (Axis 1 in Fig. S3b) pre-existed  
189 *Lm* inoculation, and was mainly driven by a differential abundance of Porphyromonadaceae  
190 (Fig. S3c and Fig. 3f). This pre-existing microbiota composition difference suggests that it plays



191 a causative role in *Lm* carriage. *Lm* inoculation also had a significant impact on microbiota  
192 composition (Axis 2 in Fig. S3b). We investigated the nature of this microbiota change  
193 (Fig. S3d), and apart from the presence of *Lm* itself, we observed a decrease in Prevotellaceae  
194 upon *Lm* inoculation (Fig. S3e), likely reflecting the impact of *Lm* bacteriocin Lmo2776 on this  
195 bacterial family<sup>44</sup>.

196

197 Here we have shown that asymptomatic *Listeria* faecal carriage correlates with virulence: it is  
198 common in pathogenic *Listeria* species and absent in non-pathogenic species. Asymptomatic  
199 faecal carriage could thus be the force exerting purifying selection on virulence genes, rather  
200 than disease, which is rare and for which there is no inter-human transmission<sup>56</sup>. This also  
201 implies that humans are not a focal host for *Lm*. Consistent with this, *Lm* is more prevalent and  
202 abundant in cattle than in human stools, which is also in line with our recent report that  
203 hypervirulent *Lm* clonal complexes are associated to cattle and dairy products<sup>8</sup>. Moura *et al.*  
204 now report that the phylogeography of the hypervirulent *Lm* clonal complex-1 is linked to cattle  
205 global trade and farming<sup>57</sup>. Taken together, these observations strongly suggest that cattle  
206 constitute a major reservoir where *Lm* virulence is selected for.

207

208 We also found that *Lm* is the predominant *Listeria* species in the environment, where it is a  
209 saprophyte. *Lm* persistence in food processing plants, away from its natural hosts, is associated  
210 with loss of virulence<sup>7,8,54</sup>. That *Lm* is found more abundantly in soil, sludge and sediments than  
211 non-pathogenic species (Fig. S1a) suggests that *Lm* regularly transits between its hosts *via* these  
212 environments, while maintaining its host-association capacity, which is mediated by its  
213 “virulence” genes. *Listeria* host-association capacity therefore appears as a trait that ensures the  
214 ecological success of *Lm* and *L. ivanovii* relative to other species. The relative lower prevalence  
215 in the environment of non-virulent *Listeria* species *L. innocua*, *L. seeligeri* and *L. welshimeri*

216 which derive from the common virulent ancestor of *Lm* and *L. ivanovii*<sup>58</sup> suggest that they either  
217 (i) successfully colonize an environment not sampled in this study, and/or (ii) lost their focal  
218 host, and/or (iii) lost their host association capacity, similar to *Lm* clones associated with food  
219 processing plants which are in the process of losing virulence<sup>7,8,54</sup>. It will be interesting to  
220 investigate how host association is also involved in the overall ecological success of other  
221 microbial species which, as *Lm*, are widespread in the environment. Future research will also  
222 have to address the relative contribution of host and *Lm* genetics, food habits, and intestinal  
223 microbiota to asymptomatic faecal carriage of *Lm*.

224 **Acknowledgments**

225 We thank Georges Michel Haustant and Cédric Fund, Biomics Platform, C2RT, Institut  
226 Pasteur, Paris, France, supported by France Génomique (ANR-10-INBS-09-09) and IBISA for  
227 16S sequencing, Auguste Fourneau and Amandine Brunet for PCR assays, and Sandrine Isaac,  
228 Henrik Salje and Olivier Disson for critical reading. LH is supported by the Pasteur-Paris  
229 University (PPU) International PhD Program, funded by the European Union's Horizon 2020  
230 research and innovation programme under the Marie Skłodowska-Curie grant agreement No  
231 665807, and the “Ecole Doctorale FIRE-Programme Bettencourt” of the CRI Paris. This work  
232 was funded by Institut Pasteur, Inserm, Laboratoire d’Excellence Integrative Biology of  
233 Emerging Infectious Diseases and the European Research Council.

234

235 **Author contributions**

236 ML initiated and coordinated the project. MGG, LH, AM and ML designed the study.  
237 MGG collected and analyzed the public metagenomic data. CB and MP assessed the prevalence  
238 of *Lm* in stool donors’ cohorts. LH conducted the *in vivo* experiments in mice and the  
239 corresponding 16S rDNA analysis. LH and ML wrote the manuscript, MGG and AM  
240 commented and edited on it.

241 **References**

- 242 1. Ruhl, C. R. *et al.* Mycobacterium tuberculosis Sulfolipid-1 Activates Nociceptive  
243 Neurons and Induces Cough. *Cell* **181**, 293-305.e11 (2020).
- 244 2. Charlier, C. *et al.* Clinical features and prognostic factors of listeriosis: the  
245 MONALISA national prospective cohort study. *Lancet Infect. Dis.* **17**, 510–519 (2017).
- 246 3. Dreyer, M. *et al.* Listeria monocytogenes sequence type 1 is predominant in ruminant  
247 rhombencephalitis. *Sci. Rep.* **6**, (2016).
- 248 4. Toledo-Arana, A. *et al.* The Listeria transcriptional landscape from saprophytism to  
249 virulence. *Nature* **459**, 950–956 (2009).
- 250 5. Moura, A. *et al.* Whole genome-based population biology and epidemiological  
251 surveillance of Listeria monocytogenes. *Nat. Microbiol.* **2**, (2016).
- 252 6. Louie, A., Zhang, T., Becattini, S., Waldor, M. K. & Portnoy, D. A. A Multiorgan  
253 Trafficking Circuit Provides Purifying Selection of Listeria monocytogenes Virulence  
254 Genes. *MBio* **10**, (2019).
- 255 7. Maury, M. M. *et al.* Spontaneous loss of virulence in natural populations of Listeria  
256 monocytogenes. *Infect. Immun.* **85**, (2017).
- 257 8. Maury, M. M. *et al.* Hypervirulent Listeria monocytogenes clones' adaption to  
258 mammalian gut accounts for their association with dairy products. *Nat. Commun.* **10**,  
259 (2019).
- 260 9. Zhang, T. *et al.* Deciphering the landscape of host barriers to Listeria monocytogenes  
261 infection. *Proc. Natl. Acad. Sci. U. S. A.* **114**, 6334–6339 (2017).
- 262 10. Melton-Witt, J. A., Rafelski, S. M., Portnoy, D. A. & Bakardjiev, A. I. Oral infection  
263 with signature-tagged Listeria monocytogenes reveals organ-specific growth and  
264 dissemination routes in guinea pigs. *Infect. Immun.* **80**, 720–732 (2012).
- 265 11. Ricci, A. *et al.* Listeria monocytogenes contamination of ready-to-eat foods and the

- 266 risk for human health in the EU. *EFSA J.* **16**, (2018).
- 267 12. Scallan, E. *et al.* Foodborne illness acquired in the United States-Major pathogens.  
268 *Emerg. Infect. Dis.* **17**, 7–15 (2011).
- 269 13. Pohl, A. M. *et al.* Differences among Incidence Rates of Invasive Listeriosis in the U.S.  
270 FoodNet Population by Age, Sex, Race/Ethnicity, and Pregnancy Status, 2008-2016.  
271 *Foodborne Pathog. Dis.* **16**, 290–297 (2019).
- 272 14. Lamont, R. J. & Postlethwaite, R. Carriage of *Listeria monocytogenes* and related  
273 species in pregnant and non-pregnant women in Aberdeen, Scotland. *J. Infect.* **13**, 187–  
274 193 (1986).
- 275 15. Esteban, J. I., Oporto, B., Aduriz, G., Juste, R. A. & Hurtado, A. Faecal shedding and  
276 strain diversity of *Listeria monocytogenes* in healthy ruminants and swine in Northern  
277 Spain. *BMC Vet. Res.* **5**, (2009).
- 278 16. Schuchat, A., Swaminathan, B. & Broome, C. V. *Epidemiology of Human Listeriosis.*  
279 *CLINICAL MICROBIOLOGY REVIEWS* vol. 4 <http://cmr.asm.org/> (1991).
- 280 17. Kampelmacher, E. H. & Van Noorle Jansen, L. M. Listeriosis in humans and animals  
281 in the Netherlands (1958-1977). *Zentralblatt fur Bakteriologie, Mikrobiologie und Hygiene - Abteilung*  
282 *I Orig. A* (1980) doi:10.1016/s0172-5599(80)80115-5.
- 283 18. Müller, H. E. *Listeria* isolations from feces of patients with diarrhea and from healthy  
284 food handlers. *Infection* **18**, 97–100 (1990).
- 285 19. Sauders, B. D. *et al.* Low Prevalence of *Listeria monocytogenes* in Human Stool.  
286 *Journal of Food Protection* vol. 68 (2005).
- 287 20. Macgowan, A. P., Marshall, R. J. & Mackay, I. M. *Listeria* faecal carriage by renal  
288 transplant recipients, haemodialysis patients and patients in general practice: Its  
289 relation to season, drug therapy, foreign travel, animal exposure and diet. *Epidemiol.*  
290 *Infect.* **106**, 157–166 (1991).

- 291 21. Grif, K. *et al.* Prevalence and characterization of *Listeria monocytogenes* in the feces  
292 of healthy Austrians. *Wien. Klin. Wochenschr.* **113**, 737–42 (2001).
- 293 22. Grif, K., Patscheider, G., Dierich, M. P. & Allerberger, F. Incidence of fecal carriage of  
294 *Listeria monocytogenes* in three healthy volunteers: a one-year prospective stool  
295 survey. *Eur. J. Clin. Microbiol. Infect. Dis.* **22**, 16–20 (2003).
- 296 23. Schuchat, A. *et al.* Gastrointestinal Carriage of *Listeria monocytogenes* in Household  
297 Contacts of Patients with Listeriosis. *J. Infect. Dis.* **167**, 1261–1262 (1993).
- 298 24. Le Monnier, A., Abachin, E., Beretti, J.-L., Berche, P. & Kayal, S. Diagnosis of  
299 *Listeria monocytogenes* Meningoencephalitis by Real-Time PCR for the hly Gene §. *J.*  
300 *Clin. Microbiol.* **49**, 3917–3923 (2011).
- 301 25. Ivanek, R., Gröhn, Y. T. & Wiedmann, M. *Listeria monocytogenes* in multiple habitats  
302 and host populations: Review of available data for mathematical modeling. *Foodborne*  
303 *Pathogens and Disease* vol. 3 319–336 (2006).
- 304 26. Nightingale, K. K. *et al.* Ecology and transmission of *Listena monocytogenes* infecting  
305 ruminants and in the farm environment. *Appl. Environ. Microbiol.* **70**, 4458–4467  
306 (2004).
- 307 27. Linke, K. *et al.* Reservoirs of *Listeria* species in three environmental ecosystems. *Appl.*  
308 *Environ. Microbiol.* **80**, 5583–5592 (2014).
- 309 28. Culina, A., Crowther, T. W., Ramakers, J. J. C., Gienapp, P. & Visser, M. E. How to  
310 do meta-analysis of open datasets. *Nat. Ecol. Evol.* 2018 27 **2**, 1053–1056 (2018).
- 311 29. Gurevitch, J., Koricheva, J., Nakagawa, S. & Stewart, G. Meta-analysis and the science  
312 of research synthesis. *Nature* vol. 555 175–182 (2018).
- 313 30. Meyer, F. *et al.* The metagenomics RAST server – a public resource for the automatic  
314 phylogenetic and functional analysis of metagenomes. *BMC Bioinformatics* **9**, 386  
315 (2008).

- 316 31. Guillet, C. *et al.* Human listeriosis caused by *Listeria ivanovii*. *Emerg. Infect. Dis.* **16**,  
317 136–138 (2010).
- 318 32. Segata, N. On the Road to Strain-Resolved Comparative Metagenomics. *mSystems* **3**,  
319 (2018).
- 320 33. Tessler, M. *et al.* Large-scale differences in microbial biodiversity discovery between  
321 16S amplicon and shotgun sequencing. doi:10.1038/s41598-017-06665-3.
- 322 34. Ramage, C. P., Low, J. C., McLauchlin, J. & Donachie, W. Characterisation of *Listeria*  
323 *ivanovii* isolates from the UK using pulsed-field gel electrophoresis. *FEMS Microbiol.*  
324 *Lett.* **170**, 349–353 (1999).
- 325 35. Kanuganti, S. R., Wesley, I. V., Reddy, P. G., McKean, J. & Hurd, H. S. Detection of  
326 *Listeria monocytogenes* in pigs and pork. *J. Food Prot.* **65**, 1470–1474 (2002).
- 327 36. Yokoyama, E., Saitoh, T., Maruyama, S. & Katsube, Y. The marked increase of  
328 *Listeria monocytogenes* isolation from contents of swine cecum. *Comp. Immunol.*  
329 *Microbiol. Infect. Dis.* **28**, 259–268 (2005).
- 330 37. Wacheck, S., Fredriksson-Ahomaa, M., König, M., Stolle, A. & Stephan, R. Wild  
331 boars as an important reservoir for foodborne pathogens. *Foodborne Pathog. Dis.* **7**,  
332 307–312 (2010).
- 333 38. Zundel, E. & Bernard, S. *Listeria monocytogenes* translocates throughout the digestive  
334 tract in asymptomatic sheep. *J. Med. Microbiol.* **55**, 1717–1723 (2006).
- 335 39. Fredriksson-Ahomaa, M., Gerhardt, M. & Stolle, A. High bacterial contamination of  
336 pig tonsils at slaughter. *Meat Sci.* **83**, 334–336 (2009).
- 337 40. Aureli, P. *et al.* An Outbreak of Febrile Gastroenteritis Associated with Corn  
338 Contaminated by *Listeria monocytogenes*. *N. Engl. J. Med.* **342**, 1236–1241 (2000).
- 339 41. Dalton, C. B. *et al.* An Outbreak of Gastroenteritis and Fever Due to *Listeria*  
340 *monocytogenes* in Milk. *N. Engl. J. Med.* **336**, 100–106 (1997).

- 341 42. Buffie, C. G. & Pamer, E. G. Microbiota-mediated colonization resistance against  
342 intestinal pathogens. *Nat Rev Immunol* vol. 13 790–801 (2013).
- 343 43. Becattini, S. *et al.* Commensal microbes provide first line defense against *Listeria*  
344 *monocytogenes* infection. *J. Exp. Med.* **214**, 1973–1989 (2017).
- 345 44. Rolhion, N. *et al.* A *Listeria monocytogenes* Bacteriocin Can Target the Commensal  
346 *Prevotella copri* and Modulate Intestinal Infection. *Cell Host Microbe* **26**, 691-701.e5  
347 (2019).
- 348 45. Quereda, J. J. *et al.* Bacteriocin from epidemic *Listeria* strains alters the host intestinal  
349 microbiota to favor infection. *Proc. Natl. Acad. Sci. U. S. A.* **113**, 5706–5711 (2016).
- 350 46. Gloor, G. B., Macklaim, J. M., Pawlowsky-Glahn, V. & Egozcue, J. J. Microbiome  
351 Datasets Are Compositional: And This Is Not Optional. *Front. Microbiol.* **8**, 2224  
352 (2017).
- 353 47. Heras, V. Las *et al.* Short-term consumption of a high-fat diet increases host  
354 susceptibility to *Listeria monocytogenes* infection. *Microbiome* **7**, (2019).
- 355 48. Rea, M. C. *et al.* *Clostridium difficile* Carriage in Elderly Subjects and Associated  
356 Changes in the Intestinal Microbiota. (2012) doi:10.1128/JCM.05176-11.
- 357 49. Ferreira, R. B. R. *et al.* The intestinal microbiota plays a role in salmonella-induced  
358 colitis independent of pathogen colonization. *PLoS One* **6**, (2011).
- 359 50. Ubeda, C. *et al.* Intestinal microbiota containing *Barnesiella* species cures vancomycin-  
360 resistant *Enterococcus faecium* colonization. *Infect. Immun.* **81**, 965–973 (2013).
- 361 51. Schubert, A. M., Sinani, H. & Schloss, P. D. Antibiotic-induced alterations of the  
362 murine gut microbiota and subsequent effects on colonization resistance against  
363 *Clostridium difficile*. *MBio* **6**, (2015).
- 364 52. Vincent, C. *et al.* Reductions in intestinal Clostridiales precede the development of  
365 nosocomial *Clostridium difficile* infection. *Microbiome* **1**, 18 (2013).



- 366 53. Singh, P. *et al.* Intestinal microbial communities associated with acute enteric  
367 infections and disease recovery. *Microbiome* **3**, 45 (2015).
- 368 54. Maury, M. M. *et al.* Uncovering *Listeria monocytogenes* hypervirulence by harnessing  
369 its biodiversity. *Nat. Genet.* **48**, 308–313 (2016).
- 370 55. Neff, E. P. Littermate wanted: standardizing mouse gut microbiota requires more than  
371 cohousing. *Lab Animal* vol. 48 197 (2019).
- 372 56. de Graaf, M. *et al.* Sustained fecal-oral human-to-human transmission following a  
373 zoonotic event. *Current Opinion in Virology* vol. 22 1–6 (2017).
- 374 57. Moura, A. *et al.* Global spread of main hypervirulent *Listeria monocytogenes*  
375 sublineage. *co-submission* (2020).
- 376 58. Schmid, M. W. *et al.* Evolutionary history of the genus *Listeria* and its virulence genes.  
377 *Syst. Appl. Microbiol.* **28**, 1–18 (2005).

378

## 379 **Materials and methods**

### 380 *Screening of Listeria sp. in 16S rDNA datasets*

381 A summary of the study workflow is represented in Fig. S4. We collected 13,749 16S rDNA  
382 amplification datasets from MG-RAST from studies with >5 and <50 samples, for studies  
383 containing host samples <250 (last accessed: November 2017) as described in <sup>59</sup>. When more  
384 samples were available, we randomly selected 50 or 250 samples, respectively. We removed  
385 those containing non-ribosomal data or less than 2000 sequences using SSU-align v.1.01<sup>60</sup>. This  
386 left us with a total of 11,907 rDNA datasets (Supplementary Table S5). Sequences shorter than  
387 60 bp were removed. 16S rDNA sequence datasets were re-aligned using mafft v. 7.407<sup>61</sup>, and  
388 trimmed using trimal v.1.4<sup>62</sup> using the ‘automated1’ algorithm. The resulting trimmed  
389 sequences were then clustered within each sample at 99% identity and 90% coverage using the  
390 uclust algorithm from usearch v. 10.0.240<sup>63</sup>. A representative sequence of each cluster was  
391 defined according to the distance to the cluster centroid. Henceforth, we will call these our  
392 environmental dataset.

393 To identify *Listeria* ssp. in the environmental dataset we used a maximum likelihood approach.  
394 First, *Lm* 16S rDNA reference sequences were aligned using mafft with the ‘linsi’ algorithm.  
395 The resulting multiple sequence alignment was trimmed using trimal v.1.4. A phylogenetic  
396 reconstruction was then performed using IQ-tree v.1.6.5<sup>64</sup> using the GTR model (according to  
397 the model test) and 1000 rapid bootstrap iterations. The resulting tree was manually pruned to  
398 leave only one representative member of each clade. Environmental sequences were then  
399 classified as potential *Listeria* candidates by mapping them against the multiple sequence  
400 alignment using the ‘-addfragments’ algorithm of mafft. Sequences with at least 90% identity  
401 and 90% coverage to one reference member were kept for further analyses, or otherwise were  
402 discarded. The remaining sequences were then assigned to one of the branches of the  
403 phylogenetic tree using the evolutionary placement algorithm implemented in RAxML v. 8.2<sup>65</sup>.

404 Environmental sequences assigned to any terminal branches with a maximum likelihood of 0.6  
405 or higher, were classified as the specific *Listeria* species. Otherwise, they were classified as  
406 “*Listeria* undefined”. Note that this was the case for sequences with a non-discriminative  
407 amplicon region at the species level, e.g. V3-V4. In this work, we focused on all *Listeria sensu*  
408 *stricto* species, which are frequently found in the environment (*Lm*, *L. ivanovii*, *L. innocua*, *L.*  
409 *seeligeri* and *L. welshimeri*). We did not include the closest non-pathogenic relative of *Lm*, *L.*  
410 *marthii* since it is only rarely sampled in any environment<sup>66</sup>.

411 The remaining representative sequences were used to construct a global catalogue of  
412 operational taxonomic units (OTUs). To do so, the representative sequences of all datasets were  
413 grouped and clustered together at 97% identity using usearch, and the frequency of each OTU  
414 was calculated on each dataset. Finally, OTU representatives were taxonomically classified at  
415 genus level using the RDP classifier<sup>67</sup>. At the same time, we defined the  $\alpha$ -diversity of each  
416 dataset as the Expected Number of Species (ENS). To do so, we did calculate the Shannon  
417 diversity index ( $H'$ ):

$$418 \quad H' = - \sum_{i=1}^R p_i \ln(p_i)$$

419  
420 where  $p_i$  is the relative frequency of a specific species in the dataset (the number of sequences  
421 associated with the species divided by the total number of sequences assigned to species), and  
422  $R$  is the number of datasets. We calculated the ENS as the exponential of the Shannon diversity:

$$423 \quad ENS = e^{H'}$$

424

425

### 426 ***Screening of Listeria sp. in 16S full metagenomes***

427 We followed the approach described in Garcia-Garcera et al 2017. In brief, we retrieved around  
428 3,000 metagenomes from MG-RAST. To characterize the presence of *Lm*, reads were mapped  
429 against a discriminative concatenate of genes, here the 7 housekeeping genes used for

430 multilocus sequence typing in *Lm*<sup>68</sup>. Since no reads could be mapped to these gene concatenate,  
431 no further downstream analysis has been performed. The absence of *Lm* in full metagenomes  
432 can either be due to the low relative abundance of *Lm* per se which does not permit it to be  
433 identified, or previous filtering of reads from species with low abundance.

434

#### 435 ***Detection of Lm in human faecal samples***

436 Determination of faecal carriage of *Lm* was performed by PCR amplifying *hly*<sup>24</sup>. We evaluated  
437 the performance of this method using artificial samples that mimic natural stool. Briefly, 10-  
438 fold dilutions of the ATCC *Lm* strain (ATCC BAA751) in saline buffer (10<sup>8</sup> to 10<sup>1</sup> CFU/mL)  
439 were diluted in a 1:1 ratio in a PCR-negative stool sample conserved on eNat (Copan, Italy)  
440 before extraction. Extraction was performed with EasyMag (bioMérieux, Marcy-l'Etoile,  
441 France) according to manufacturer's recommendations. PCR assays were performed in  
442 triplicate on a CFX96 system (BioRad, CA, USA) as described <sup>24</sup>. *Lm* was considered present  
443 when at least 2 of 3 PCR assays were positive. *Lm* detection threshold was 10<sup>6</sup> CFU/ml of stool.  
444 Tested stool samples originated from two cohorts collected and stored on eNat (Copan): (i) the  
445 Hepystool cohort that included samples (n=900 samples, 2015-2016) from non-diarrheic  
446 patients (inclusion criteria described in <sup>69</sup>) and (ii) stool samples from diarrheic patients,  
447 received at the Infectious Agents Department of the University Hospital of Poitiers, France.  
448 DNA was extracted on EasyMag (bioMérieux, Marcy-l'Etoile, France) according to  
449 manufacturer's recommendations then amplified in triplicate. All samples which were at least  
450 once positive on the first triplicate were subjected to a second triplicate and were considered as  
451 positive when again detected at least once.

452 Note that no culture-based identification was applicable given that the eNat protocol conserves  
453 nucleic acid and is bactericidal within 30 minutes (see manufacturer's instructions for details).

454

455 ***Mouse colonization experiments***

456 7 to 11-week-old male mice (C57BL/6 mEcad E16P KI<sup>70</sup>) were infected intravenously in the  
457 tail vein as previously described<sup>70</sup>. Fraternities were kept together in a cage during the whole  
458 experiment, except when separated to exclude that carriage was due to coprophagy. To quantify  
459 carriage at 30-days post-inoculation, faeces were collected from each individual mouse and  
460 weighted before being homogenized in 2ml of PBS. CFU count was performed by serial  
461 dilution of homogenized faeces on ALOA plates as described in <sup>8</sup>. Separate faecal pellets were  
462 collected pre-inoculation and/or 30 days-post-inoculation and stored at -20°C for DNA  
463 extraction for 16S sequencing.

464

465 ***16S rDNA analysis in mice***

466 DNA from faeces has been isolated with DNeasy PowerSoil Kit (Qiagen) accordingly to the  
467 manufacturer's instructions. The V4 region has been amplified and sequenced with the primers  
468 CCTACGGGNGGCWGCAG and GACTACNVGGGTWTCTAATCC using the Illumina  
469 MiSeq workflow at the biomics platform at the Institut Pasteur, Paris. Analysis have been  
470 performed with micca<sup>71</sup>, using the RDP classifier<sup>72</sup> and unoise3 for clustering<sup>73</sup>. Forward and  
471 reverse reads were merged with a minimum overlap of 100bp and 30 maximum allowed  
472 mismatches. Forward and reverse primers were removed and reads were trimmed to 400  
473 nucleotides using the mica workflow. Reads with an expected error rate above 0.75% were  
474 excluded. Reads were grouped in sequence variants by unoise3<sup>73</sup> and chimeric sequences were  
475 removed. Sequence variants were classified with RDP<sup>72</sup>, which uses VSEARCH to match  
476 sequences with the reference database<sup>74</sup>. Statistical were performed with R and the phyloseq,  
477 vegan and microbiome libraries<sup>75,76</sup>.  $\alpha$ -diversity has been calculated by number of observed  
478 species, abundance-based coverage estimator (ACE)<sup>77</sup> and Shannon index<sup>78</sup>.  $\beta$ -diversity  
479 between samples has been calculated with MDS of Bray-Curtis dissimilarities<sup>79</sup>.

480 PERMANOVA and homogeneity between microbiome groups were calculated with adonis and  
481 betadispers from the vegan library<sup>80</sup>.

482

### 483 *Ethical statement*

484 Animal experiments were performed according to the Institut Pasteur guidelines for laboratory  
485 animals' husbandry and in compliance with European regulation 2010/63 EU. All procedures  
486 were approved by the Animal Ethics Committee of Institut Pasteur, authorized by the French  
487 Ministry of Research and registered under #11995-201703115103592 and #14644-  
488 2018041116183944. The stool donor cohorts received ethical approval from the regional  
489 Committee for the Protection of People (CPP Ouest III) and from the National commission for  
490 Protection of Personal data on November 23<sup>th</sup> 2015. All patients were informed before inclusion  
491 and their consent was obtained before analysis.

492

### 493 *Data availability*

494 Primary sequencing data are available on the Sequence Read Archive under the entry  
495 PRJNA642013

496 **Figure legends**

497 **Figure 1. *Lm* is more prevalent in host-associated environments than non-pathogenic**  
498 ***Listeria* species**

499 Relative abundance and prevalence of *Listeria sensu stricto* species in 16S datasets in **a.**  
500 different environments, **b.** in selected host datasets for which metadata detailing the host species  
501 were available and **c.** from different sampling sites of healthy human hosts for which detailed  
502 metadata on body sampling site were available. Numbers on the right indicate (*Listeria* positive  
503 samples/total samples) *per* category.

504  
505 **Figure 2. *Lm* carriage correlates with a specific microbiota signature in humans**

506 All significant correlations with more than 75 associated samples and  $\rho > 0.2$  between *Lm* and  
507 commensals relative abundance in 108 healthy carrier (left panels) and comparison between  
508 carriers and non-carriers for the same groups (right panels): **a.** The ratio of Firmicutes to  
509 Bacteroidetes phyla ( $\rho = 0.44$ ,  $P = 2.75 \times 10^{-5}$ , note that *Lm* species was excluded when the  
510 relative abundance of Firmicutes was calculated), **b.** The ratio of Actinobacteria to  
511 Bacteroidetes ( $\rho = 0.414$ ,  $P = 6.1 \times 10^{-5}$ ), **c.** Lachnospiraceae ( $\rho = 0.326$ ,  $P = 1.25 \times 10^{-3}$ ), **d.**  
512 Coriobacteriales ( $\rho = 0.314$ ,  $P = 4.01 \times 10^{-2}$ ), **e.** Actinomycetaceae ( $\rho = 0.265$ ,  $P = 7.18 \times 10^{-11}$ ), **f.**  
513 Erysipelotrichaceae ( $\rho = 0.226$ ,  $P = 4.51 \times 10^{-2}$ ), **g.** Porphyromonadaceae ( $\rho = -0.337$ ,  
514  $P = 4.28 \times 10^{-3}$ ). Statistical comparison performed with two-sided Wilcoxon rank-sum test with  
515 Benjamini-Hochberg correction for multiple test. \*  $P < 0.05$ , \*\*  $P < 0.01$ , \*\*\*  $P < 0.001$  \*\*\*\*  $P$   
516  $< 0.0001$ .

517

518 **Figure 3. *Lm* long-term carriage correlates with a specific microbiota signature in mice**

519 **a.** CFU/g of stool of male mice 30 days after an *iv* challenge with *Lm* at  $5 \times 10^3$  CFU from  
520 different cages (2-6 mice per cage). Color indicates carriage group ( $< 100$  CFU/g: none,  $100-$   
521  $10^6$  CFU/g: light,  $> 10^6$  CFU/g: heavy). Horizontal lines indicate the threshold between the  
522 groups. **b.**  $\beta$ -diversity of mice microbiomes using MDS and Bray-Curtis distance. The color  
523 indicates the carriage group ( $< 100$  CFU/g: none,  $100-10^6$  CFU/g: light,  $> 10^6$  CFU/g: heavy).  
524 All groups differed in composition (PERMANOVA overall  $P = 0.001$ , heavy/none  $P = 0.006$ ,  
525 heavy/light  $P = 0.0075$ , light/none  $P = 0.031$ , with Benjamini-Hochberg correction). Light  
526 carriers were more homogeneous than other groups (permutation test for homogeneity of  
527 multivariate dispersion, heavy/none,  $P = 0.246$ , heavy/light  $P = 0.0160$ , light/none  $P = 0.0193$ ,  
528 with Benjamini-Hochberg correction) **c.** Microbiota composition of mice from Fig. 2c at phyla  
529 level and **d.** family level within the Bacteroidetes phylum. **e.** PERMANOVA coefficients of 25

530 most different taxa between heavy and none-carriers microbiota from (Fig. 3b) according to  
531 their family. Horizontal bar indicates microbiota association (orange: none, green: heavy) **f.**  
532 Relative abundance of Porphyromonadaceae in 16S data from mice from different carriage  
533 groups. Statistical comparison performed with two-sided Wilcoxon rank-sum test. \*  $P < 0.05$ , \*\*  
534  $P < 0.01$ , \*\*\*  $P < 0.001$  \*\*\*\*  $P < 0.0001$ .

535

### 536 **Supplementary Figure 1. *Lm* is more abundant than other *Listeria* species in all** 537 **environments and *Lm* carriage is common in healthy individuals**

538 (Related to Figure 1)

539 **a.** Same as Fig. 1a normalised by category. **b.** Log<sub>2</sub> of ratio of *Lm* to each other evaluated  
540 *Listeria* species in samples where the species co-occurred. Vertical line and number indicate the  
541 mean of the distribution. **c.** Prevalence of *Lm* in human faecal samples from healthy (n=900)  
542 and diarrheic donors (n=125) from France.

543

### 544 **Supplementary Figure 2. *Lm* carriage correlates with low $\alpha$ -diversity**

545 (Related to Figures 2 and 3)

546 **a.**  $\alpha$ -diversity, measured by ENS between carriers and non-carriers, similar to Fig. 2B. **b.** Body  
547 weight change of mice after inoculation at 3 days post-inoculation and 30 days post-inoculation  
548 according to their carriage group. **c.** Carriage groups differ in  $\alpha$ -diversity, measured by observed  
549 species (left), abundance-based coverage estimate (middle) and Shannon index (right).  
550 Statistical comparison performed with two-sided Wilcoxon rank-sum test. \*  $P < 0.05$ , \*\*  $P < 0.01$ ,  
551 \*\*\*  $P < 0.001$  \*\*\*\*  $P < 0.0001$ .

552

### 553 **Supplementary Figure 3. Effect of *Lm* inoculation on microbiome composition**

554 (Related to Figure 3)

555 Comparison of microbiota pre-inoculation and 30-days post-inoculation for 2 cages with 3 non-  
556 carrier and 2 heavy carrier mice. **a.**  $\alpha$ -diversity, measured by observed species (left), abundance-  
557 based coverage estimates (middle) and Shannon index (right) before inoculation and 30-days  
558 post-inoculation. Statistical comparison performed with two-sided Wilcoxon rank-sum test. **b.**  
559  $\beta$ -diversity of mice microbiomes using MDS and Bray-Curtis distance. The colour indicates the  
560 carriage group (<100 CFU/g: none, >10<sup>6</sup> CFU/g: heavy) and the shape the timepoint (round:  
561 Pre-inoculation, square: 30-days post-inoculation). **c.** Relative abundance of  
562 Porphyromonadacea pre-inoculation and 30-days post-inoculation. **d.** PERMANOVA



563 coefficients of 25 most different taxa between microbiomes pre-inoculation and 30-days post-  
564 inoculation (Fig. S3b). Horizontal bar indicates microbiota association (grey: pre-inoculation,  
565 black: post-inoculation) e. Relative abundance of Prevotellaceae pre-inoculation and 30-days  
566 post-inoculation.

567

568 **Supplementary Figure 4. Workflow of screening of *Listeria sp.* in 16S rDNA datasets.**  
569 (Related to Material and Methods)

570 Data was retrieved from MG-RAST. Samples from studies with <5 samples were excluded,  
571 samples from studies with >5 and <50 samples and random selections of samples from studies  
572 with >50 samples were included. For each sample, sequences were aligned and trimmed, and  
573 then clustered. A representative sequence from each sequence cluster was then mapped to  
574 *Listeria sp.* sequences. Sequences with >90% identity and coverage with at least one *Listeria*  
575 were assigned to a tree of *Listeria* reference sequences by a evolutionary placement algorithm.  
576 Sequences with a maximum likelihood >0.6 for a single terminal branch were assigned to the  
577 corresponding species, others were excluded from downstream analysis.

578

579

580 **Supplementary Tables**

581

582 **Supplementary Table S1.** Sensitivity of *hly* PCR in different matrices

583 **Supplementary Table S2.** Metadata of stool collection cohort

584 **Supplementary Table S3.** Correlations of *Lm* abundance with microbial phyla

585 **Supplementary Table S4.** Correlations of *Lm* abundance with microbial families and orders

586 **Supplementary Table S5.** List of 16S datasets from MG-RAST used in this study

587 **Supplementary references**

- 588 59. Garcia-Garcera, M. & Rocha, E. P. C. Community diversity and habitat structure shape  
589 the repertoire of extracellular proteins in bacteria. *Nat. Commun.* **11**, 758 (2020).
- 590 60. Nawrocki, E. *Structural RNA Homology Search and Alignment Using Covariance*  
591 *Models Recommended Citation*. <https://openscholarship.wustl.edu/etd/256> (2009).
- 592 61. Katoh, K. MAFFT: a novel method for rapid multiple sequence alignment based on fast  
593 Fourier transform. *Nucleic Acids Res.* **30**, 3059–3066 (2002).
- 594 62. Capella-Gutierrez, S., Silla-Martinez, J. M. & Gabaldon, T. trimAl: a tool for  
595 automated alignment trimming in large-scale phylogenetic analyses. *Bioinformatics* **25**,  
596 1972–1973 (2009).
- 597 63. Edgar, R. C. Search and clustering orders of magnitude faster than BLAST.  
598 *Bioinformatics* **26**, 2460–2461 (2010).
- 599 64. Nguyen, L.-T., Schmidt, H. A., von Haeseler, A. & Minh, B. Q. IQ-TREE: A Fast and  
600 Effective Stochastic Algorithm for Estimating Maximum-Likelihood Phylogenies. *Mol.*  
601 *Biol. Evol.* **32**, 268–274 (2015).
- 602 65. Stamatakis, A. RAxML version 8: a tool for phylogenetic analysis and post-analysis of  
603 large phylogenies. *Bioinformatics* **30**, 1312–1313 (2014).
- 604 66. Sauders, B. D. *et al.* Diversity of *Listeria* species in urban and natural environments.  
605 *Appl. Environ. Microbiol.* **78**, 4420–4433 (2012).
- 606 67. Cole, J. R. *et al.* The Ribosomal Database Project (RDP-II): previewing a new  
607 autoaligner that allows regular updates and the new prokaryotic taxonomy. *Nucleic*  
608 *Acids Res.* **31**, (2003).
- 609 68. Ragon, M. *et al.* A New Perspective on *Listeria monocytogenes* Evolution. *PLoS*  
610 *Pathog.* **4**, e1000146 (2008).
- 611 69. Pichon, M. *et al.* Diagnostic accuracy of a non-invasive test for the detection of

- 612 *Helicobacter pylori* and resistance to clarithromycin in stool by Real-Time PCR  
613 Amplidiag<sup>®</sup> *H. pylori* + ClariR assay. *J. Clin. Microbiol.* (2020)  
614 doi:10.1128/JCM.01787-19.
- 615 70. Disson, O. *et al.* Modeling human listeriosis in natural and genetically engineered  
616 animals. *Nat. Protoc.* **4**, 799–810 (2009).
- 617 71. Albanese, D., Fontana, P., De Filippo, C., Cavalieri, D. & Donati, C. MICCA: A  
618 complete and accurate software for taxonomic profiling of metagenomic data. *Sci. Rep.*  
619 **5**, (2015).
- 620 72. Wang, Q., Garrity, G. M., Tiedje, J. M. & Cole, J. R. Naïve Bayesian classifier for  
621 rapid assignment of rRNA sequences into the new bacterial taxonomy. *Appl. Environ.*  
622 *Microbiol.* **73**, 5261–5267 (2007).
- 623 73. Edgar, R. C. *UNOISE2: improved error-correction for Illumina 16S and ITS amplicon*  
624 *sequencing. bioRxiv* <http://biorxiv.org/content/early/2016/10/15/081257.abstract> (2016)  
625 doi:10.1101/081257.
- 626 74. Rognes, T., Flouri, T., Nichols, B., Quince, C. & Mahé, F. VSEARCH: A versatile  
627 open source tool for metagenomics. *PeerJ* **2016**, (2016).
- 628 75. McMurdie, P. J. & Holmes, S. Shiny-phyloseq: Web application for interactive  
629 microbiome analysis with provenance tracking. *Bioinformatics* **31**, 282–283 (2015).
- 630 76. Lahti, L. & Shetty, S. Tools for microbiome analysis in R. Version 1.9.19.
- 631 77. Chao, A. & Lee, S. M. Estimating the number of classes via sample coverage. *J. Am.*  
632 *Stat. Assoc.* **87**, 210–217 (1992).
- 633 78. Hill, M. O. Diversity and Evenness: A Unifying Notation and Its Consequences.  
634 *Ecology* **54**, 427–432 (1973).
- 635 79. Bray, J. R. & Curtis, J. T. An Ordination of the Upland Forest Communities of  
636 Southern Wisconsin. *Ecol. Monogr.* **27**, 325–349 (1957).

637 80. Oksanen, Jari *et al.* vegan: Community Ecology Package. (2019).

638

## Figure 1

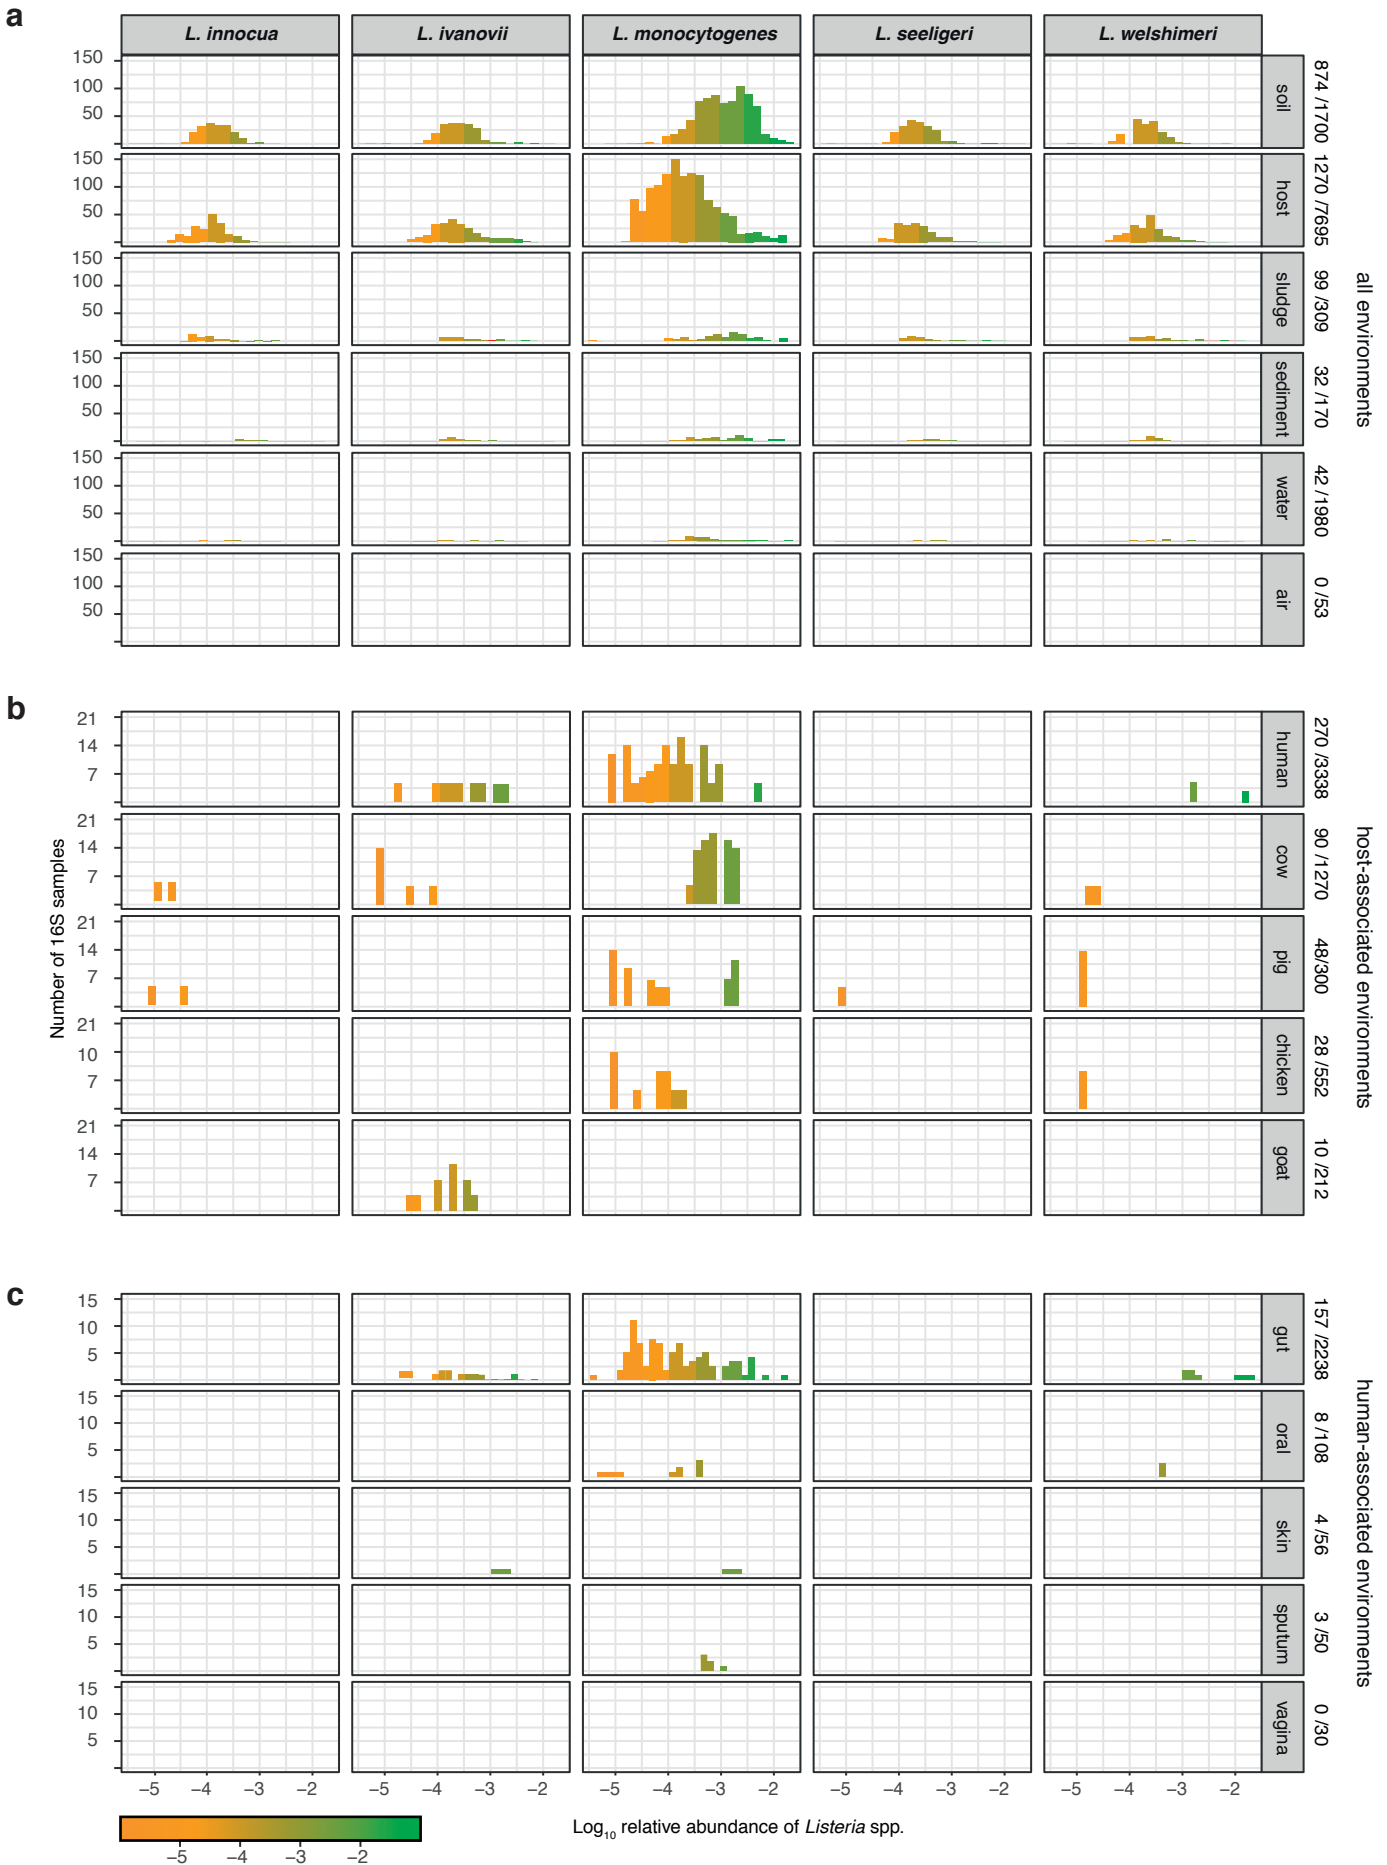

**Figure 1. *Lm* is more prevalent in host-associated environments than non-pathogenic *Listeria* species**

Relative abundance and prevalence of *Listeria sensu stricto* species in 16S datasets in **a**, different environments, **b**, in selected host datasets for which metadata detailing the host species were available and **c**, from different sampling sites of healthy human hosts for which detailed metadata on body sampling site were available. Numbers on the right side indicate number of *Listeria* positive samples/total samples *per* category.

## Figure 2

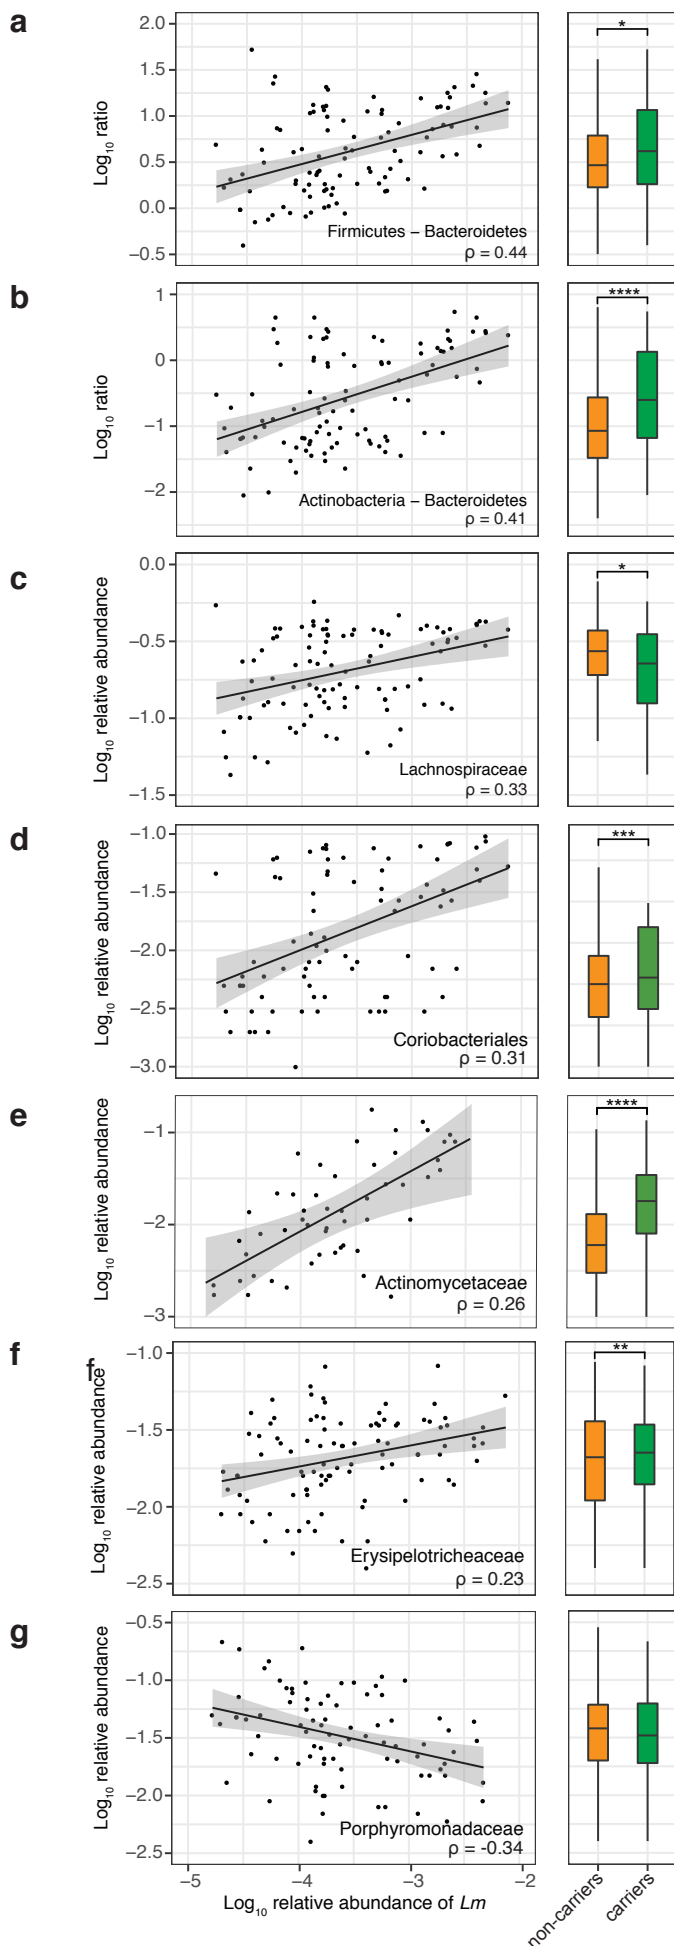

### Figure 2. *Lm* carriage correlates with a specific microbiota signature in humans

All significant correlations with more than 75 associated samples and  $\rho > 0.2$  between *Lm* and commensals relative abundance in 108 healthy carrier (left panels) and comparison between carriers and non-carriers for the same groups (right panels): **a**. The ratio of Firmicutes to Bacteroidetes phyla ( $\rho = 0.44$ ,  $P = 2.75 \times 10^{-5}$ , note that *Lm* species was excluded when the relative abundance of Firmicutes was calculated), **b**. The ratio of Actinobacteria to Bacteroidetes ( $\rho = 0.414$ ,  $P = 6.1 \times 10^{-5}$ ), **c**. Lachnospiraceae ( $\rho = 0.326$ ,  $P = 1.25 \times 10^{-3}$ ), **d**. Coriobacteriales ( $\rho = 0.314$ ,  $P = 4.01 \times 10^{-2}$ ), **e**. Actinomycetaceae ( $\rho = 0.265$ ,  $P = 7.18 \times 10^{-11}$ ), **f**. Erysipelotrichaceae ( $\rho = 0.226$ ,  $P = 4.51 \times 10^{-2}$ ), **g**. Porphyromonadaceae ( $\rho = -0.337$ ,  $P = 4.28 \times 10^{-3}$ ). Statistical comparison performed with two-sided Wilcoxon rank-sum test with Benjamini-Hochberg correction for multiple test. \*  $P < 0.05$ , \*\*  $P < 0.01$ , \*\*\*  $P < 0.001$ , \*\*\*\*  $P < 0.0001$ .

### Figure 3

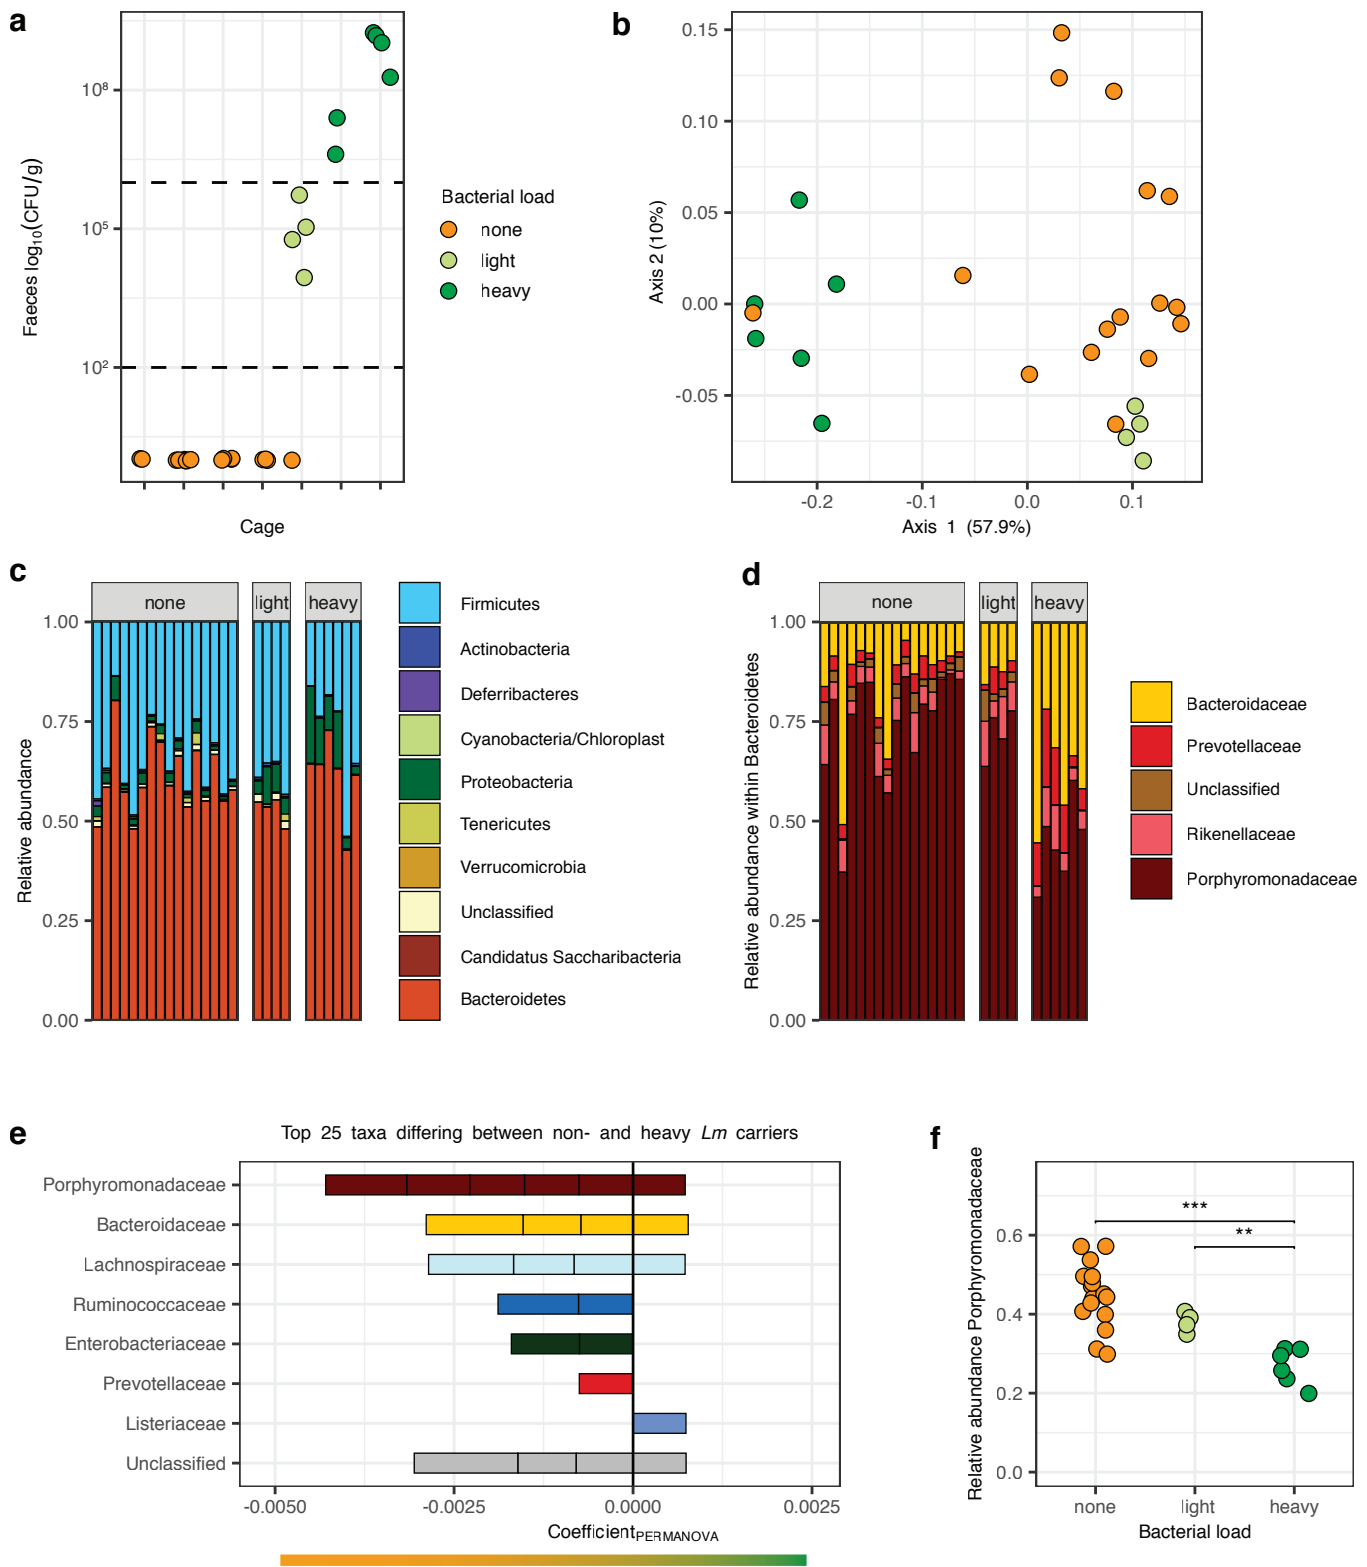

### Figure 3. *Lm* long-term carriage correlates with a specific microbiota signature in mice

**a.** CFU/g of stool of male mice 30 days after an *iv* challenge with *Lm* at  $5 \times 10^3$  CFU from different cages (2-6 mice per cage). Color indicates carriage group ( $<10^2$  CFU/g: none,  $10^2$ - $10^6$  CFU/g: light,  $>10^6$  CFU/g: heavy). Horizontal lines indicate the threshold between the groups. **b.**  $\beta$ -diversity of mice microbiomes using MDS and Bray-Curtis distance. The color indicates the carriage group ( $<10^2$  CFU/g: none,  $10^2$ - $10^6$  CFU/g: light,  $>10^6$  CFU/g: heavy). All groups differed in composition (PERMANOVA overall  $P=0.001$ , heavy/none  $P=0.006$ , heavy/light  $P=0.0075$ , light/none  $P=0.031$ , with Benjamini-Hochberg correction). Light carriers were more homogeneous than other groups (permutation test for homogeneity of multivariate dispersion, heavy/none,  $P=0.246$ , heavy/light  $P=0.0160$ , light/none  $P=0.0193$ , with Benjamini-Hochberg correction) **c.** Microbiota composition of mice from Fig. 2c at phyla level and **d.** family level within the Bacteroidetes phylum. **e.** PERMANOVA coefficients of 25 most different taxa between heavy and none-carriers microbiota from (Fig. 3b) according to their family. Horizontal bar indicates microbiota association (orange: none, green: heavy) **f.** Relative abundance of Porphyromonadaceae in 16S data from mice from different carriage groups. Statistical comparison performed with two-sided Wilcoxon rank-sum test. \*  $P<0.05$ , \*\*  $P<0.01$ , \*\*\*  $P<0.001$  \*\*\*\*  $P<0.0001$ .



## Figure S1

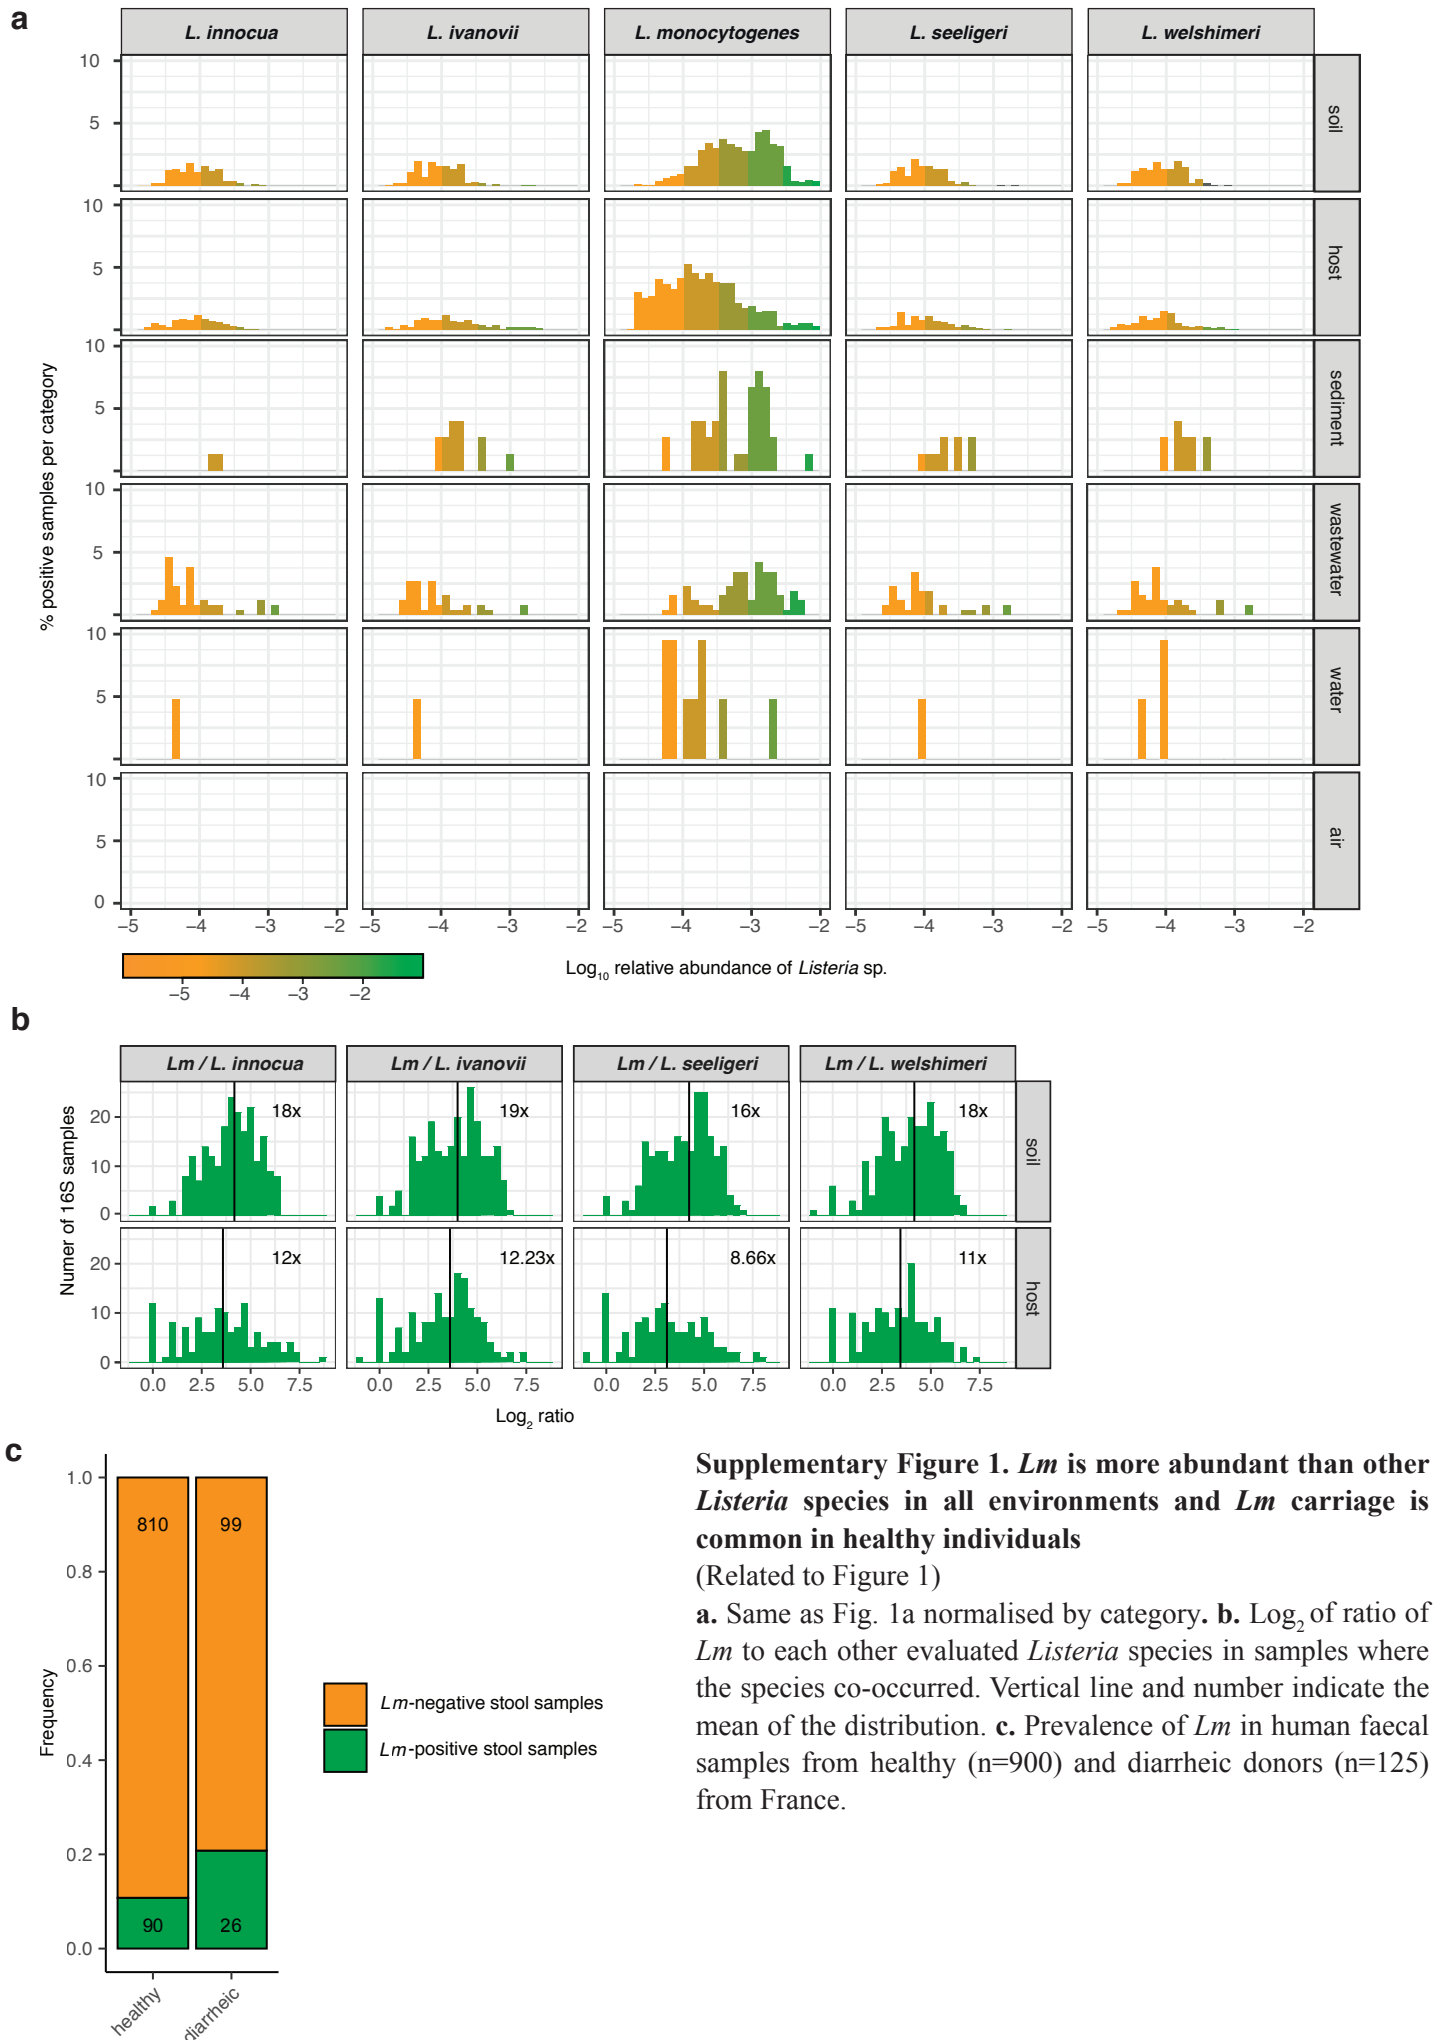

## Figure S2

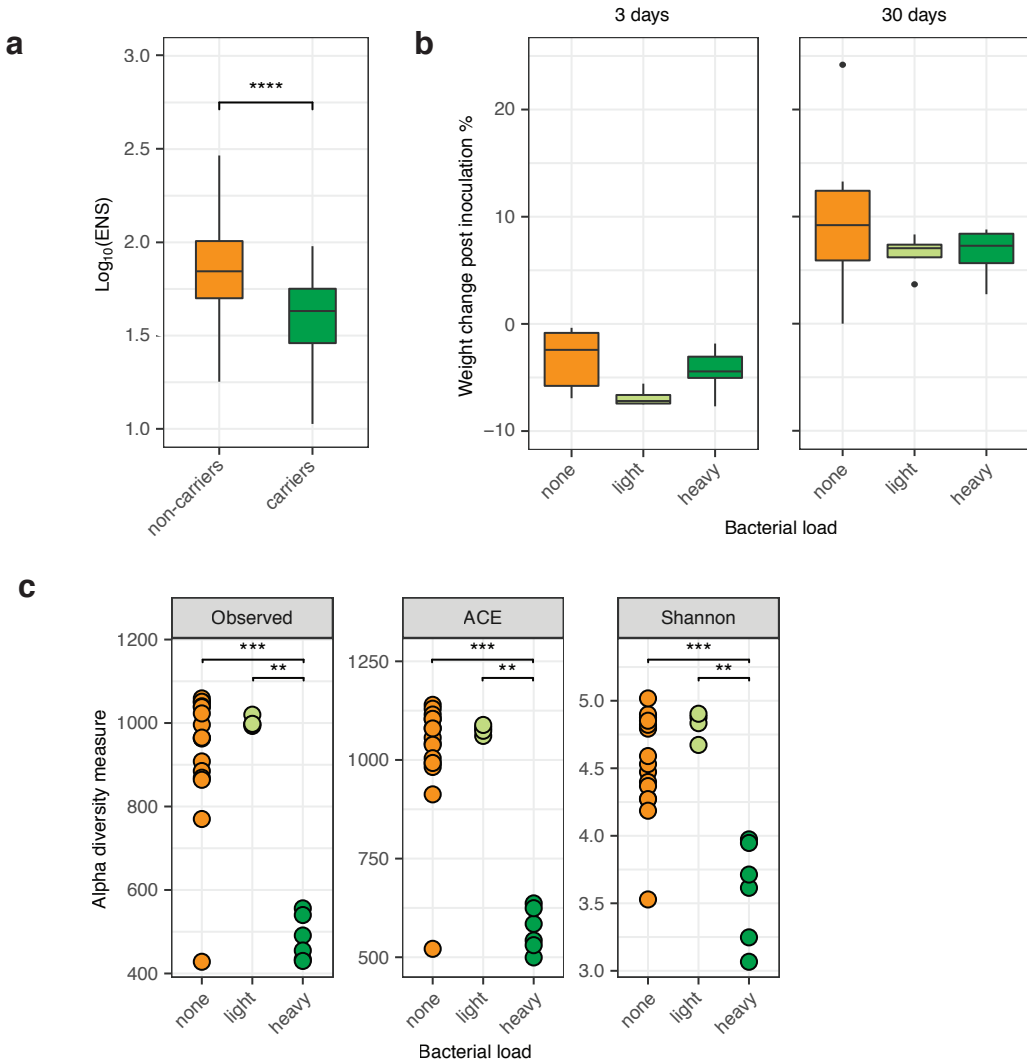

### Supplementary Figure 2. *Lm* carriage correlates with low $\alpha$ -diversity

(Related to Figure 2 and Figure 3)

**a.**  $\alpha$ -diversity, measured by ENS between carriers and non-carriers, similar to Fig. 2. **b.** Body weight change of mice after inoculation at 3 days post-inoculation and 30 days post-inoculation according to their carriage group. **c.** Carriage groups differ in  $\alpha$ -diversity, measured by observed species (left), abundance-based coverage estimate (middle) and Shannon index (right). Statistical comparison performed with two-sided Wilcoxon rank-sum test.

\*  $P < 0.05$ , \*\*  $P < 0.01$ , \*\*\*  $P < 0.001$  \*\*\*\*  $P < 0.0001$ .

## Figure S3

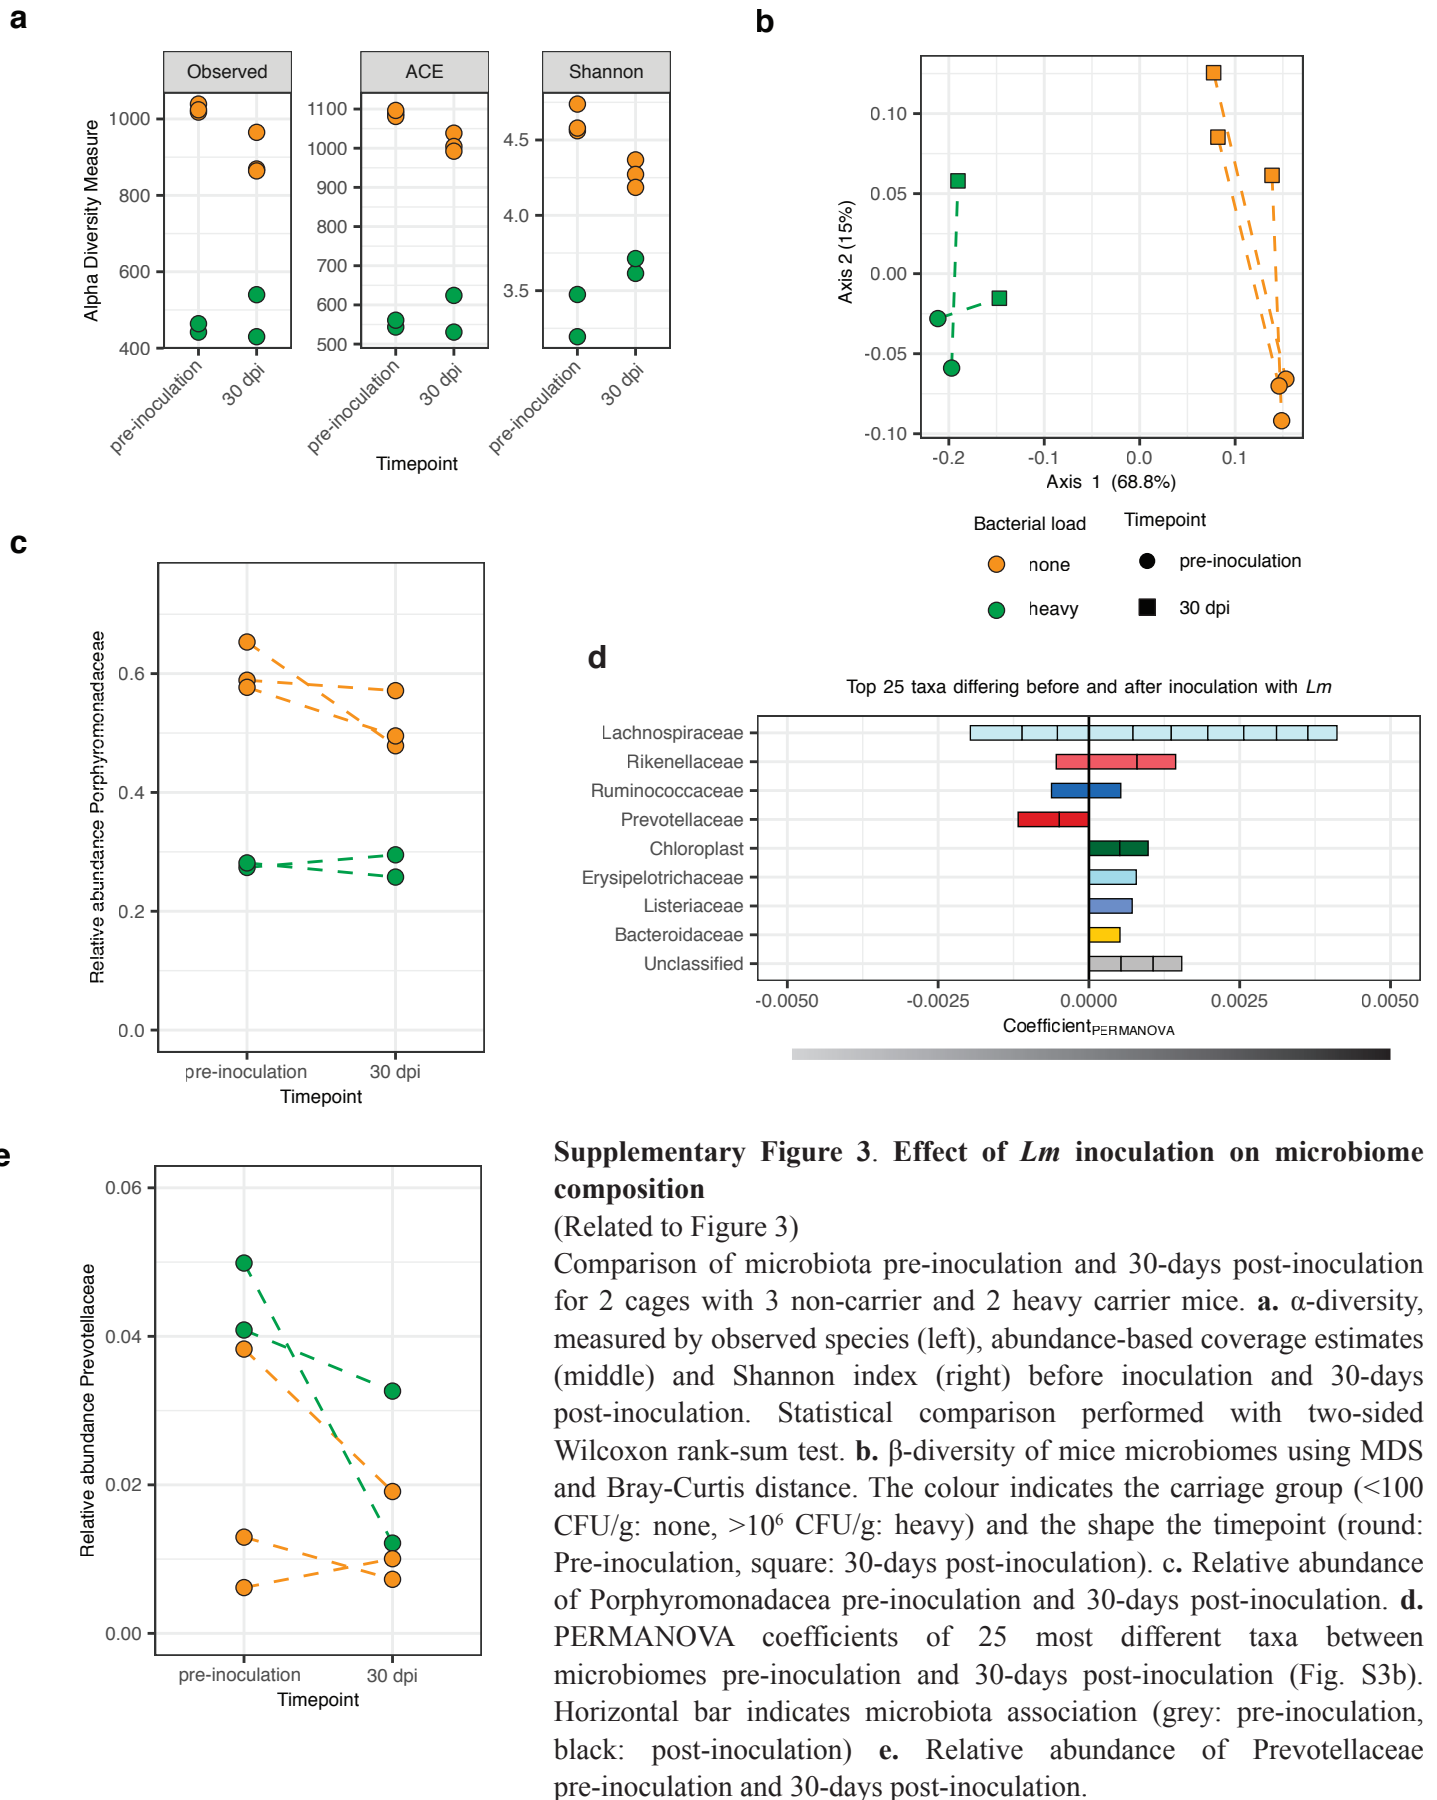

**Figure S4**

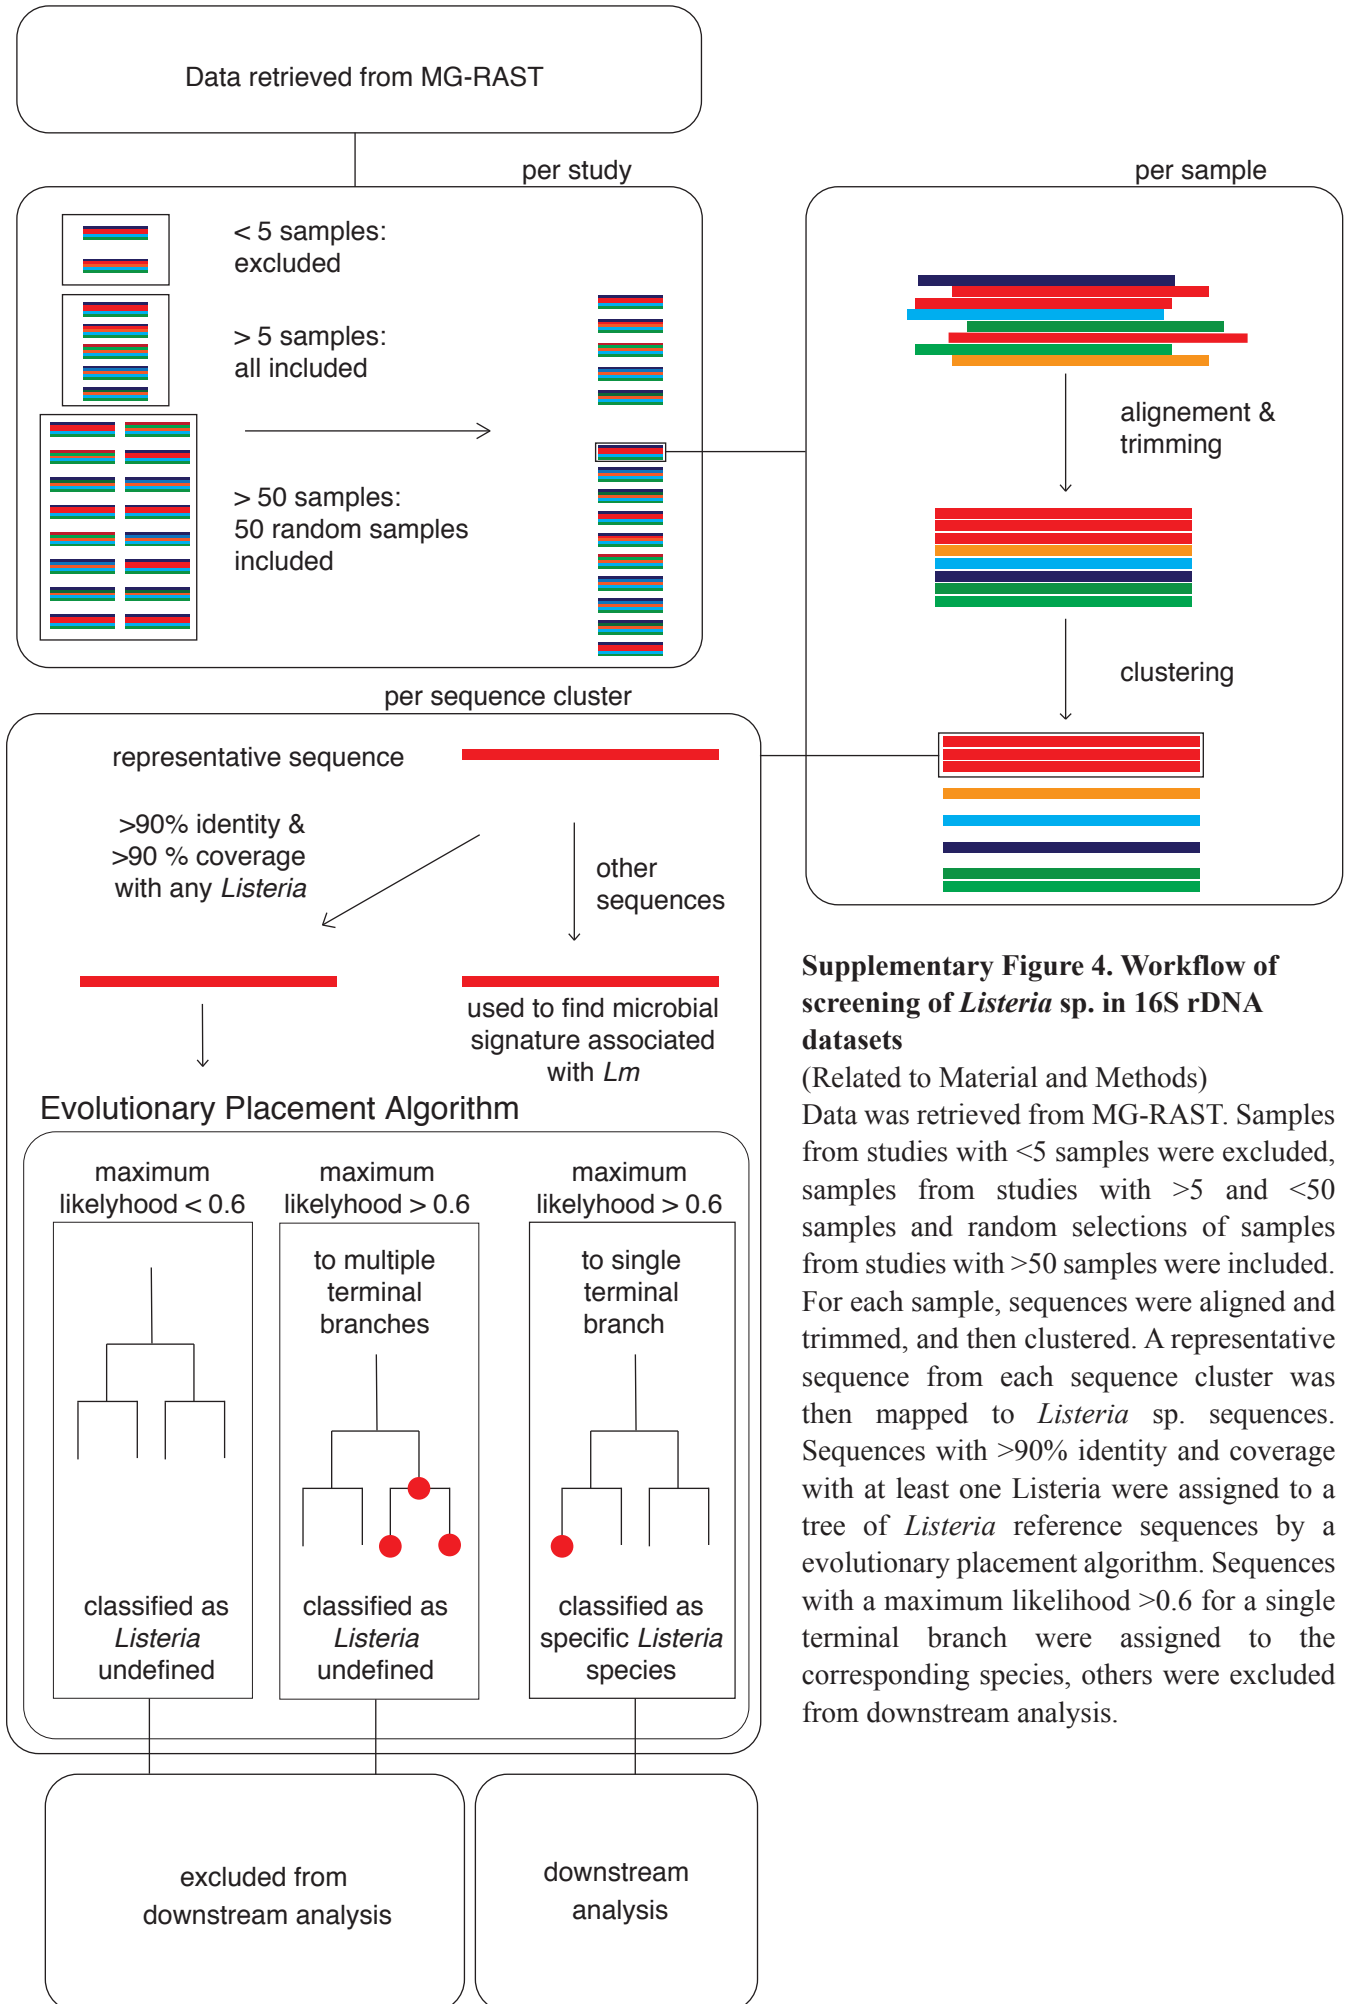

Source: https://www.biorxiv.org/content/10.1101/2021.01.13.426560v1.full.pdf
